# Supplementary material for: Predictors for Returning to Paid Work after Transient Ischemic Attack and Minor Ischemic Stroke
Source: MDPI journal article supplement (doi:10.3390/jpm12071109), 2022-07-06

# SUPPLEMENTAL INFORMATION : Predictors for Returning to Paid Work After Transient Ischemic Attack and Minor Ischemic Stroke

Corentin A. Wicht, MSc      Camille F. Chavan, PhD      Jean-Marie Annoni, MD  
Philippe Balmer, MD      Jerome Aellen, MD      Andrea M. Humm, MD  
Fabienne Crettaz von Roten, PhD      Lucas Spierer, PhD      Friedrich Medlin, MD

06/07/22

## Contents

|          |                                       |          |
|----------|---------------------------------------|----------|
| <b>1</b> | <b>NORMALITY TESTS</b>                | <b>3</b> |
| <b>2</b> | <b>BIVARIATE TESTS</b>                | <b>5</b> |
| 2.1      | RTW and Gender distributions          | 5        |
| 2.2      | Work change from 3m to 12m follow-ups | 6        |
| 2.3      | Discharge Destination                 | 7        |
| 2.4      | Etiology TOAST                        | 8        |
| 2.5      | Gender                                | 9        |
| 2.6      | Type of Work                          | 10       |
| 2.7      | Event Type                            | 11       |
| 2.8      | Living Situation                      | 12       |
| 2.9      | Smoking                               | 13       |
| 2.10     | Arterial Hypertension (HTA)           | 14       |
| 2.11     | Hyperlipidemia                        | 15       |
| 2.12     | Antilipid before Stroke               | 16       |
| 2.13     | Antilipid at Discharge                | 17       |
| 2.14     | Lesion Site                           | 18       |

|          |                                                                                      |           |
|----------|--------------------------------------------------------------------------------------|-----------|
| 2.15     | Thyroid-Stimulating Hormone (TSH)                                                    | 19        |
| 2.16     | Duration of Hospitalization                                                          | 20        |
| 2.17     | Age                                                                                  | 21        |
| 2.18     | BMI                                                                                  | 22        |
| 2.19     | LDL-Cholesterol (LDL-C)                                                              | 23        |
| 2.20     | Total Cholesterol                                                                    | 24        |
| <b>3</b> | <b>ROBUST ANOVAs</b>                                                                 | <b>25</b> |
| 3.1      | NIHSS                                                                                | 25        |
| 3.2      | Montreal Cognitive Assessment (MoCA)                                                 | 26        |
| 3.3      | Hospital Anxiety and Depression scale (HAD)                                          | 27        |
| 3.4      | Fatigue Impact Scale (FIS) Cognitive                                                 | 28        |
| 3.5      | FIS Physical                                                                         | 29        |
| 3.6      | FIS Psychosocial                                                                     | 30        |
| <b>4</b> | <b>DESCRIPTIVES AND STATISTICAL TESTS SUMMARY (extended Table 1 from manuscript)</b> | <b>31</b> |
| <b>5</b> | <b>REGRESSION MODELS</b>                                                             | <b>34</b> |
| 5.1      | Binomial Logistic Regression Model - RTpW3m_Percent (Yes/No)                         | 34        |
| 5.2      | Negative Binomial Regression Model - RTpWMonths                                      | 38        |
| <b>6</b> | <b>CAUSAL MEDIATION MODEL</b>                                                        | <b>43</b> |

This is the supplemental information for the study:

# Predictors for Returning to Paid Work After Transient Ischemic Attack and Minor Ischemic Stroke

Corentin A. Wicht<sup>1\*</sup>, MSc; Camille F. Chavan<sup>2</sup>, PhD; Jean-Marie Annoni<sup>1,2</sup>, MD; Philippe Balmer<sup>2</sup>, MD; Jerome Aellen<sup>3</sup>, MD; Andrea M. Humm<sup>2</sup>, MD; Fabienne Crettaz von Roten<sup>4</sup>, PhD; Lucas Spierer<sup>1</sup>, PhD and Friedrich Medlin<sup>2</sup>, MD

<sup>1</sup>Neurology Unit, Medicine Section, Faculty of Science and Medicine, University of Fribourg, Fribourg, Switzerland;

<sup>2</sup>Stroke Unit and Unit of Neurology, Department of Internal Medicine, Cantonal Hospital, Fribourg, Switzerland;

<sup>3</sup>Department of Radiology, Cantonal Hospital, Fribourg, Switzerland

<sup>4</sup>Lausanne Sports Sciences Institute, University of Lausanne, Lausanne, Switzerland.

Address correspondence and reprint requests to:

Friedrich Medlin, MD

Stroke Unit and Neurology Unit, HFR Fribourg

Chemin des Pensionnats 2, 1708 Fribourg

+41 26 306 22 37 (phone), +41 26 306 22 31 (fax)

Friedrich.Medlin@h-fr.ch

# 1 NORMALITY TESTS

Table S1: Normality test (shapiro-Wilk)

| variable          | RTpW_3m_Percent | statistic | p_value | sample | Skewness | Kurtosis |
|-------------------|-----------------|-----------|---------|--------|----------|----------|
| Age               | NoRTpW          | 0.971     | 0.429   | 38     | -0.435   | 0.948    |
| Age               | RTpW            | 0.945     | 0.021   | 50     | -0.357   | 0.111    |
| BMI               | NoRTpW          | 0.935     | 0.028   | 38     | 1.101    | 2.624    |
| BMI               | RTpW            | 0.859     | 0.000   | 50     | 1.611    | 2.938    |
| Duration_hospital | NoRTpW          | 0.910     | 0.008   | 34     | 1.242    | 2.731    |
| Duration_hospital | RTpW            | 0.968     | 0.313   | 40     | -0.274   | -0.423   |
| NIHSS_onset       | NoRTpW          | 0.835     | 0.000   | 33     | 0.494    | -1.048   |
| NIHSS_onset       | RTpW            | 0.678     | 0.000   | 44     | 1.828    | 3.176    |
| TSH               | NoRTpW          | 0.890     | 0.039   | 18     | 1.270    | 1.739    |
| TSH               | RTpW            | 0.962     | 0.496   | 23     | 0.247    | -0.772   |
| MoCA_onset        | NoRTpW          | 0.915     | 0.008   | 37     | -0.982   | 0.852    |
| MoCA_onset        | RTpW            | 0.858     | 0.000   | 49     | -1.421   | 2.126    |
| MoCA_3m           | NoRTpW          | 0.882     | 0.002   | 34     | -1.211   | 1.199    |
| MoCA_3m           | RTpW            | 0.868     | 0.000   | 43     | -1.603   | 4.185    |
| HAD_A_onset       | NoRTpW          | 0.967     | 0.323   | 37     | 0.508    | -0.240   |
| HAD_A_onset       | RTpW            | 0.964     | 0.158   | 46     | 0.453    | 0.223    |
| HAD_A_3m          | NoRTpW          | 0.961     | 0.263   | 34     | 0.342    | -0.542   |
| HAD_A_3m          | RTpW            | 0.960     | 0.207   | 37     | 0.468    | -0.373   |
| HAD_D_onset       | NoRTpW          | 0.849     | 0.000   | 37     | 1.472    | 1.984    |
| HAD_D_onset       | RTpW            | 0.783     | 0.000   | 46     | 1.889    | 3.850    |
| HAD_D_3m          | NoRTpW          | 0.925     | 0.023   | 34     | 0.922    | 0.370    |
| HAD_D_3m          | RTpW            | 0.817     | 0.000   | 37     | 1.512    | 1.795    |
| HAD_TOTAL_onset   | NoRTpW          | 0.960     | 0.216   | 36     | 0.592    | -0.019   |
| HAD_TOTAL_onset   | RTpW            | 0.897     | 0.001   | 46     | 1.409    | 2.982    |
| HAD_TOTAL_3m      | NoRTpW          | 0.976     | 0.659   | 34     | 0.158    | -0.627   |
| HAD_TOTAL_3m      | RTpW            | 0.915     | 0.008   | 37     | 1.005    | 0.531    |
| FIS_C_onset       | NoRTpW          | 0.911     | 0.012   | 32     | 0.758    | -0.195   |
| FIS_C_onset       | RTpW            | 0.911     | 0.004   | 40     | 0.985    | 0.894    |
| FIS_C_3m          | NoRTpW          | 0.912     | 0.013   | 32     | -0.733   | -0.275   |
| FIS_C_3m          | RTpW            | 0.918     | 0.011   | 36     | 0.774    | 0.005    |
| FIS_P_onset       | NoRTpW          | 0.933     | 0.047   | 32     | 0.133    | -1.295   |
| FIS_P_onset       | RTpW            | 0.935     | 0.024   | 40     | 0.821    | 0.893    |
| FIS_P_3m          | NoRTpW          | 0.914     | 0.015   | 32     | -0.992   | 1.354    |
| FIS_P_3m          | RTpW            | 0.934     | 0.034   | 36     | 0.670    | -0.264   |
| FIS_S_onset       | NoRTpW          | 0.961     | 0.290   | 32     | 0.437    | -0.505   |
| FIS_S_onset       | RTpW            | 0.942     | 0.041   | 40     | 0.830    | 0.757    |
| FIS_S_3m          | NoRTpW          | 0.931     | 0.042   | 32     | -0.949   | 0.765    |
| FIS_S_3m          | RTpW            | 0.914     | 0.008   | 36     | 0.846    | 0.052    |
| RTpWMonths        | NoRTpW          | 0.727     | 0.000   | 27     | 2.501    | 7.606    |
| RTpWMonths        | RTpW            | 0.527     | 0.000   | 50     | 4.609    | 27.025   |
| Cholesterol_ldl   | NoRTpW          | 0.984     | 0.850   | 37     | 0.001    | -0.394   |
| Cholesterol_ldl   | RTpW            | 0.957     | 0.081   | 47     | 0.807    | 1.949    |
| Cholesterol_total | NoRTpW          | 0.979     | 0.685   | 37     | -0.066   | -0.358   |

|                   |      |       |       |    |       |       |
|-------------------|------|-------|-------|----|-------|-------|
| Cholesterol_total | RTpW | 0.968 | 0.226 | 46 | 0.419 | 1.812 |
|-------------------|------|-------|-------|----|-------|-------|

---

## 2 BIVARIATE TESTS

### 2.1 RTW and Gender distributions

Table S2: Mean age and SD

| Mean   | SD    |
|--------|-------|
| 51.568 | 9.997 |

Figure S1: Descriptives RTpW & Gender percentage

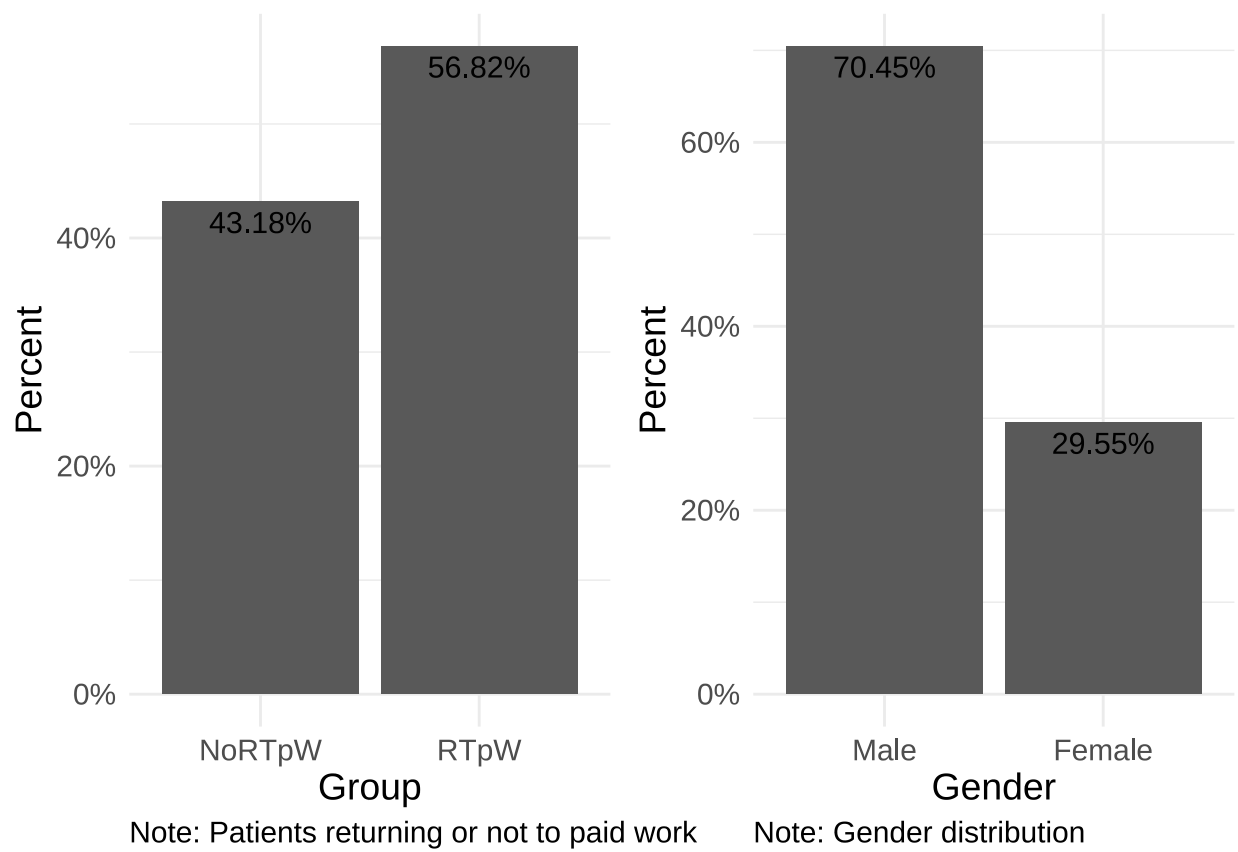

2.2 Work change from 3m to 12m follow-ups

Figure S2: Work change in percentage

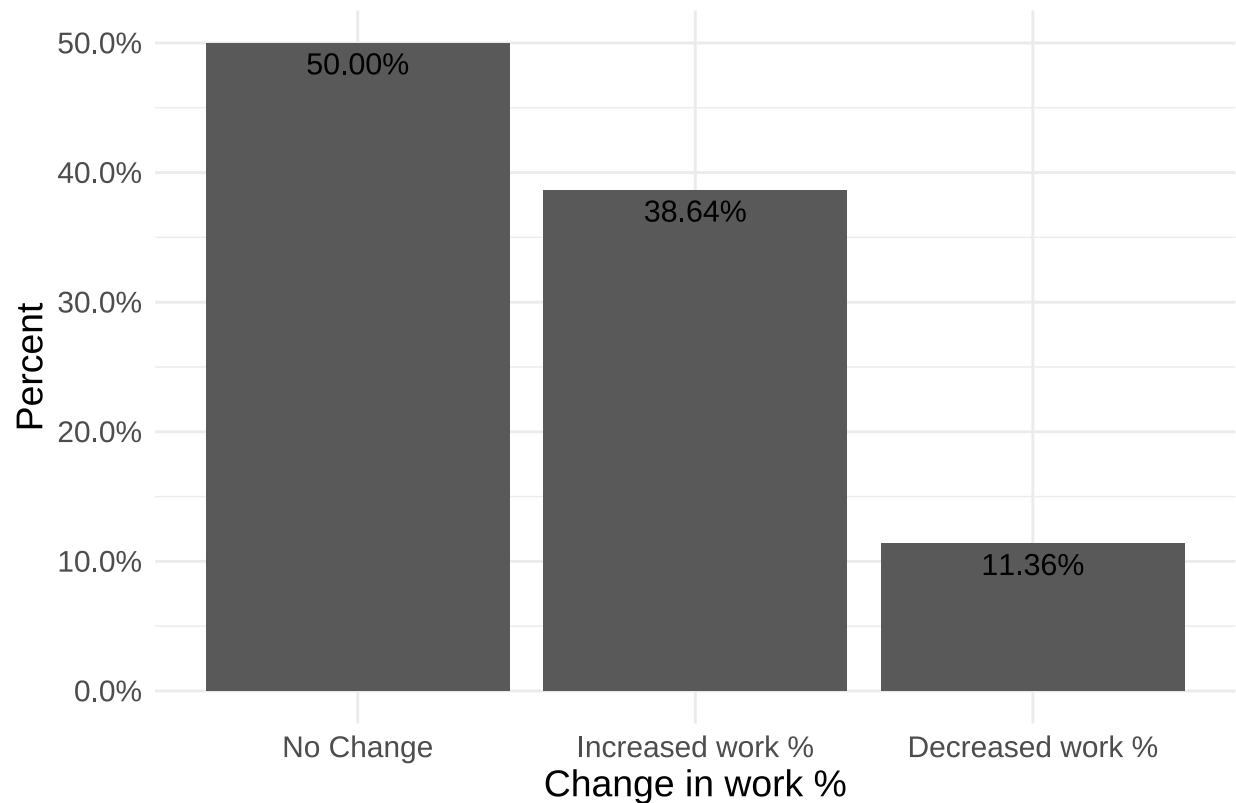

Note: Distribution of the change in work % from 3m to 12m

## 2.3 Discharge Destination

Table S3: Fisher's Exact Test for Count Data

|            | X     | Df | p     | Phi   | OR[RTpW/NoRTpW] | 2.5CI_OR | 97.5CI_OR |
|------------|-------|----|-------|-------|-----------------|----------|-----------|
| odds ratio | 0.403 | 1  | 0.525 | 0.074 | 0.4             | 0.034    | 3.005     |

*Note:*

Expected counts < 5 : 50% of cells

Figure S3: Discharge destination

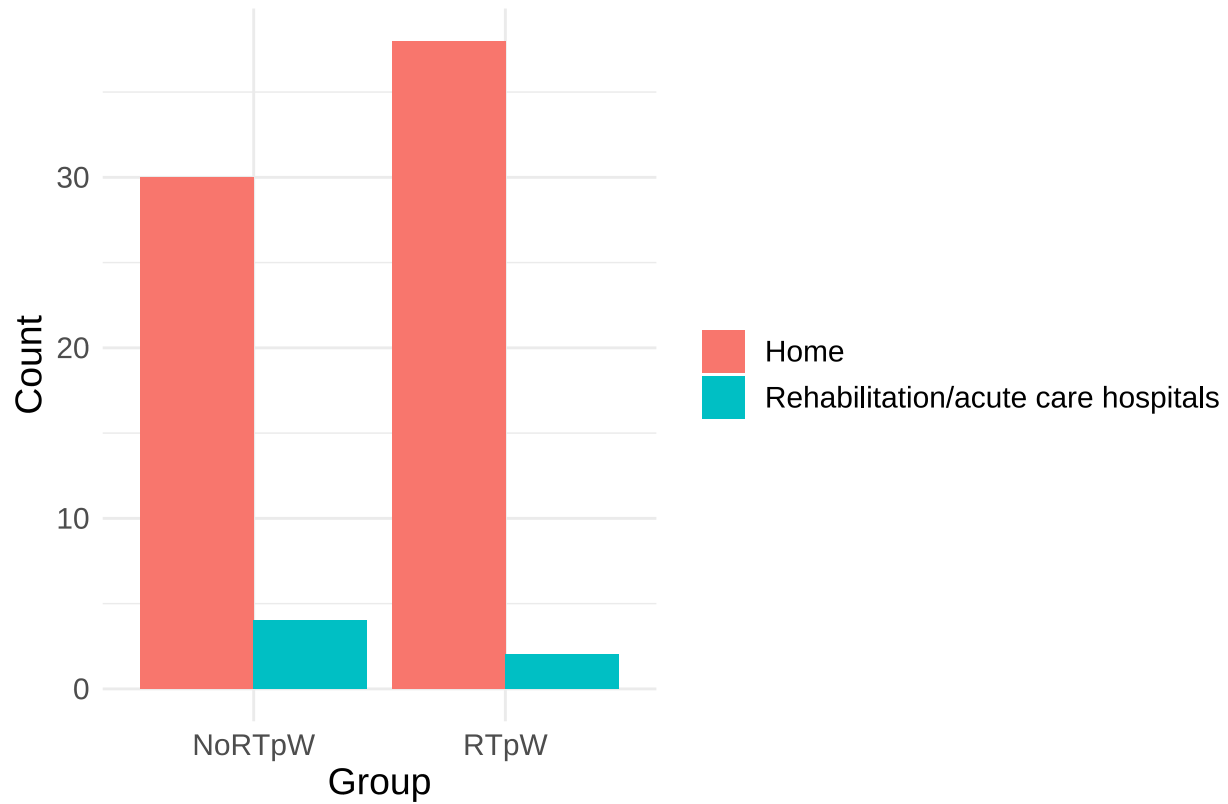

Note: Bar plot of Discharge destination distribution between groups



2.4 Etiology TOAST

Table S4: Fisher’s Exact Test for Count Data

| X     | Df | p     | Cramers_V |
|-------|----|-------|-----------|
| 6.379 | 8  | 0.605 | 0.296     |

*Note:*  
Expected counts < 5 : 66% of cells

Figure S4: Etiology TOAST

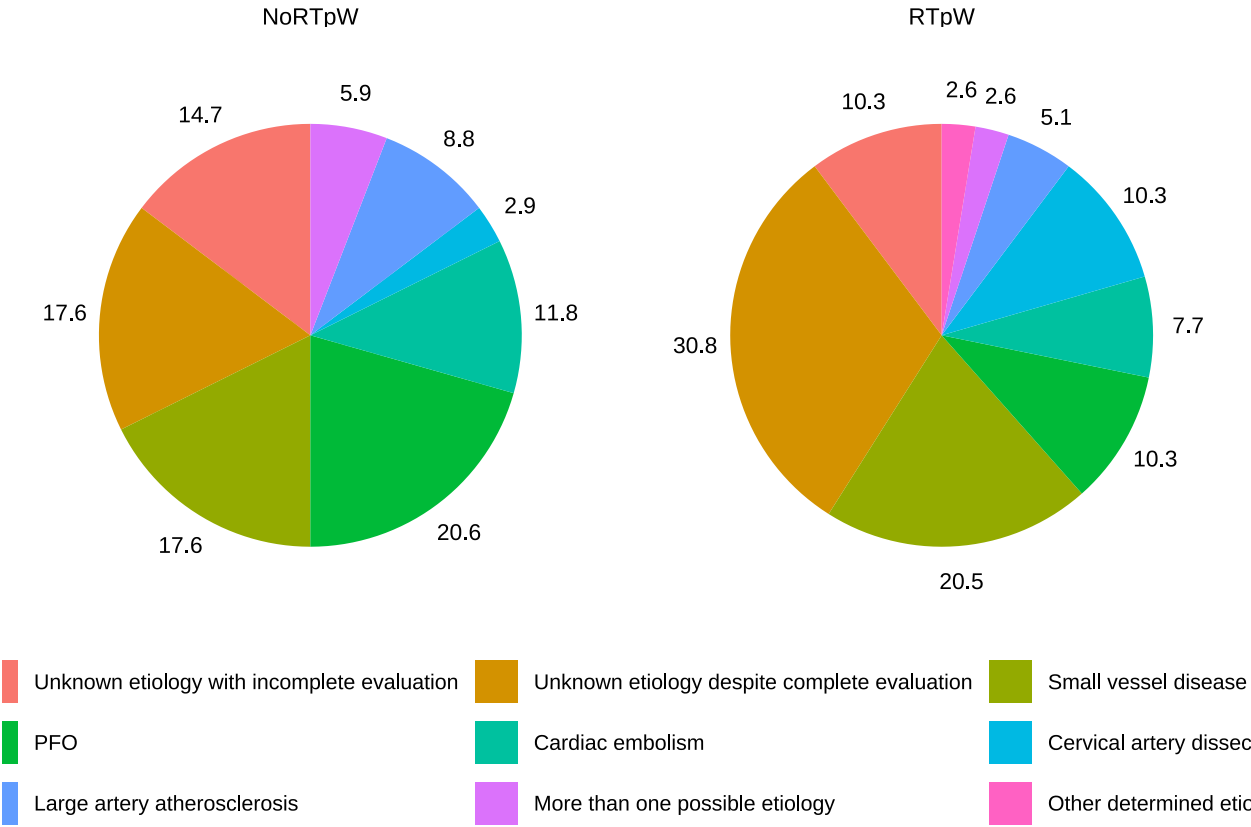

Note: Pie chart of Etiology TOAST distribution between groups

## 2.5 Gender

Table S5: Pearson's Chi-squared test with Yates' continuity correction

|            | X    | Df | p     | Phi   | OR[RTpW/NoRTpW] | 2.5CI_OR | 97.5CI_OR |
|------------|------|----|-------|-------|-----------------|----------|-----------|
| odds ratio | 0.36 | 1  | 0.548 | 0.064 | 0.679           | 0.243    | 1.884     |

*Note:*

Expected counts < 5 : 0% of cells

Figure S5: Gender

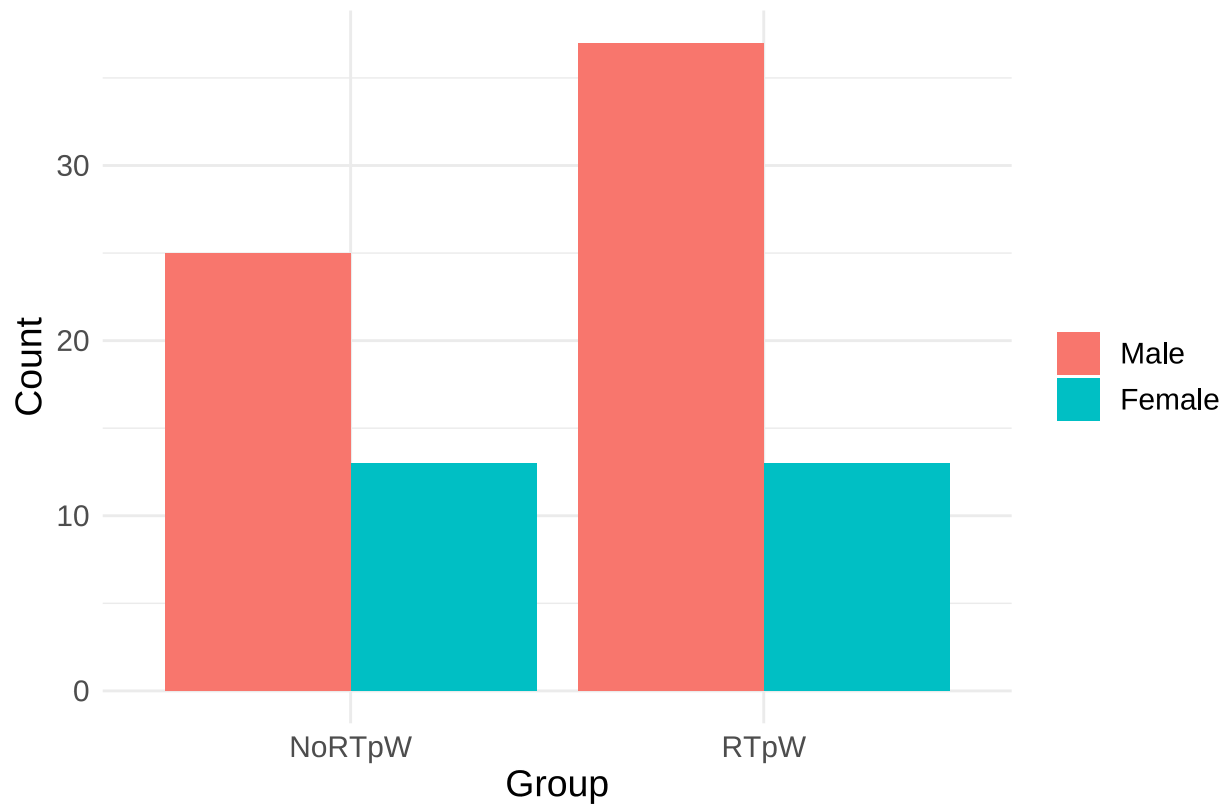

Note: Bar plot of Gender distribution between groups

## 2.6 Type of Work

Table S6: Pearson's Chi-squared test with Yates' continuity correction

|            | X | Df | p     | Phi   | OR[RTpW/NoRTpW] | 2.5CI_OR | 97.5CI_OR |
|------------|---|----|-------|-------|-----------------|----------|-----------|
| odds ratio | 1 | 1  | 0.317 | 0.107 | 0.585           | 0.222    | 1.523     |

*Note:*

Expected counts < 5 : 0% of cells

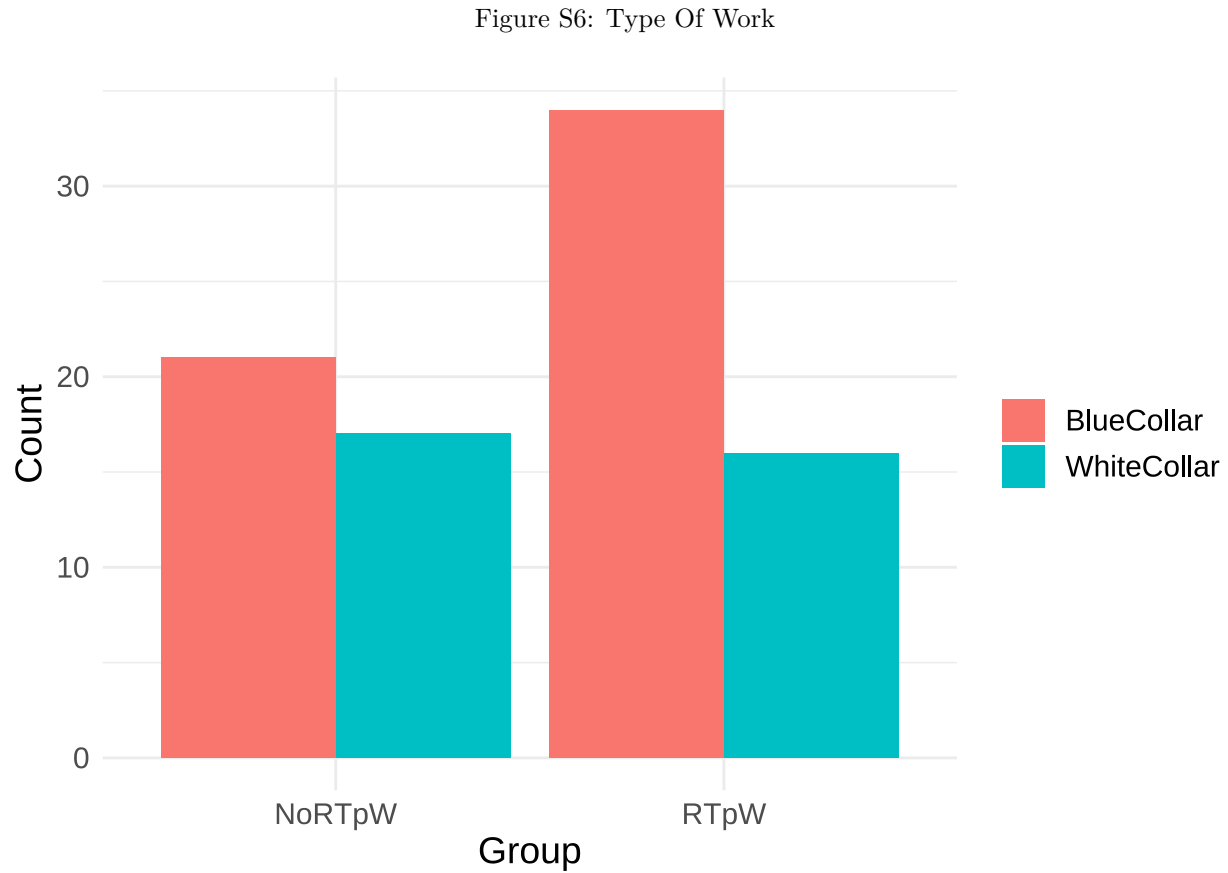

Note: Bar plot of Type Of Work distribution between groups

2.7 Event Type

Table S7: Fisher’s Exact Test for Count Data

|            | X     | Df | p     | Phi   | OR[RTpW/NoRTpW] | 2.5CI_OR | 97.5CI_OR |
|------------|-------|----|-------|-------|-----------------|----------|-----------|
| odds ratio | 0.001 | 1  | 0.973 | 0.004 | 1.348           | 0.234    | 7.791     |

Note:

Expected counts < 5 : 50% of cells

Figure S7: Event Type

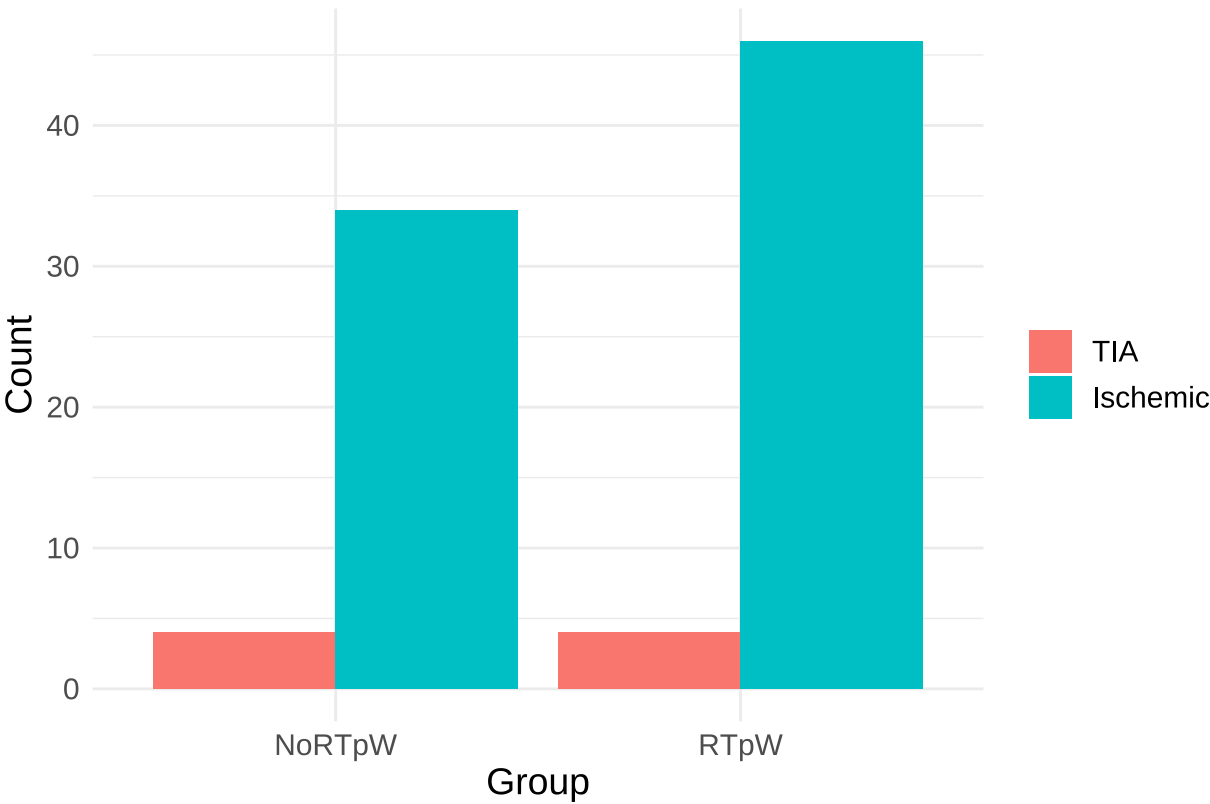

Note: Bar plot of Event Type distribution between groups

## 2.8 Living Situation

Table S8: Pearson's Chi-squared test with Yates' continuity correction

|            | X    | Df | p     | Phi   | OR[RTpW/NoRTpW] | 2.5CI_OR | 97.5CI_OR |
|------------|------|----|-------|-------|-----------------|----------|-----------|
| odds ratio | 0.59 | 1  | 0.442 | 0.082 | 1.627           | 0.562    | 4.765     |

*Note:*

Expected counts < 5 : 0% of cells

Figure S8: Living Situation

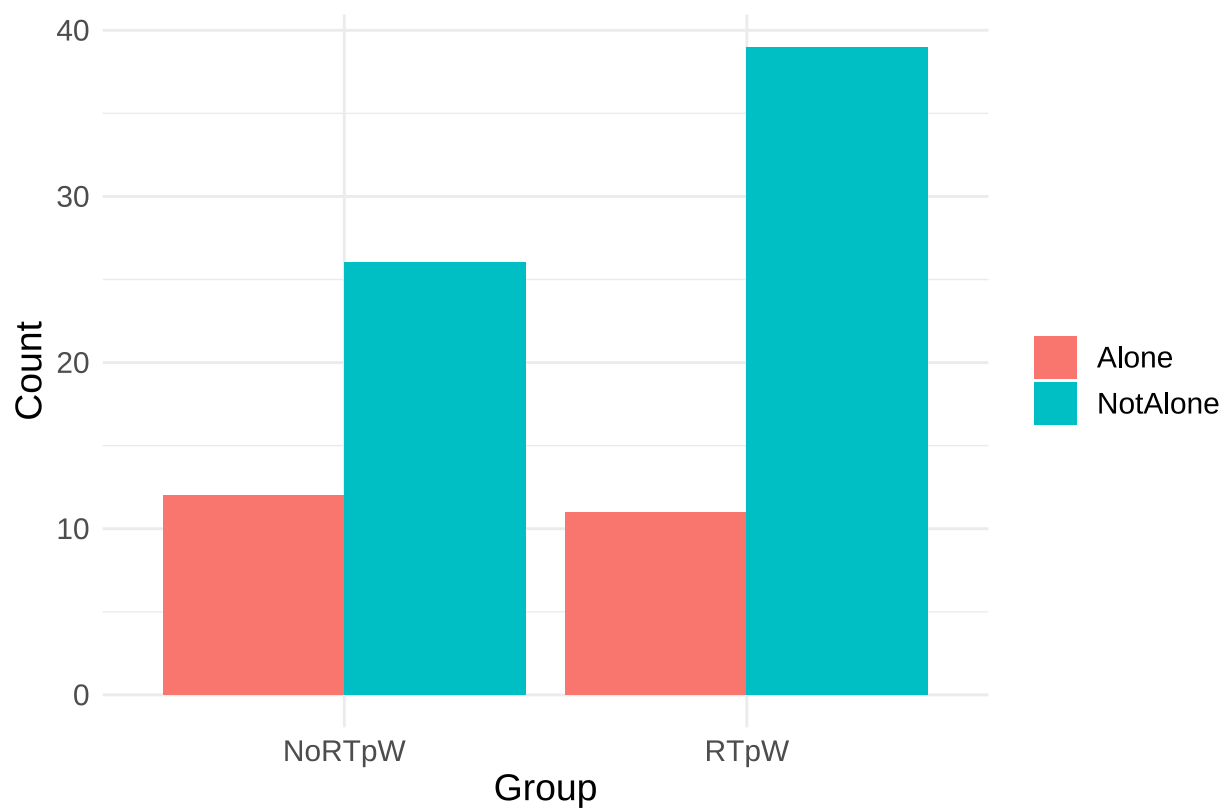

Note: Bar plot of Living Situation distribution between groups

## 2.9 Smoking

Table S9: Pearson's Chi-squared test with Yates' continuity correction

|            | X     | Df | p     | Phi  | OR[RTpW/NoRTpW] | 2.5CI_OR | 97.5CI_OR |
|------------|-------|----|-------|------|-----------------|----------|-----------|
| odds ratio | 0.007 | 1  | 0.933 | 0.01 | 0.859           | 0.304    | 2.426     |

*Note:*

Expected counts < 5 : 0% of cells

Figure S9: Smoking

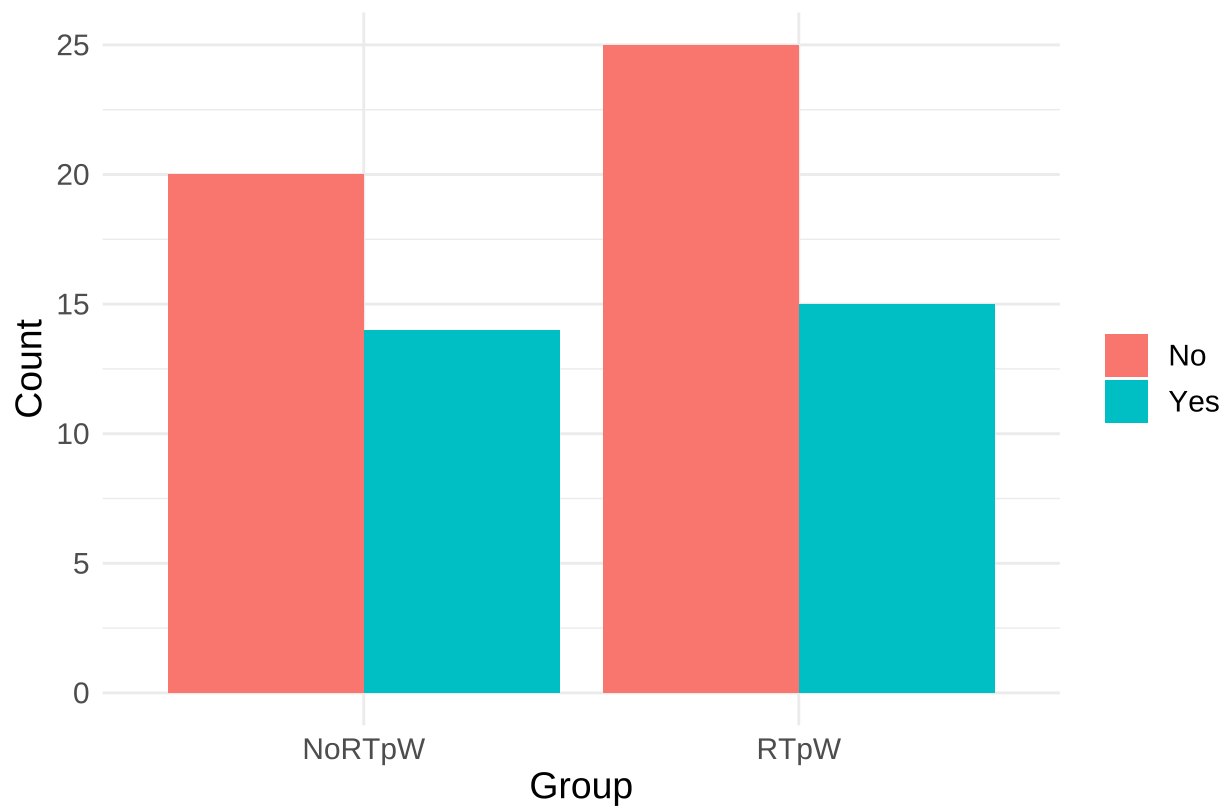

Note: Bar plot of Smoking distribution between groups

## 2.10 Arterial Hypertension (HTA)

Table S10: Pearson's Chi-squared test with Yates' continuity correction

|            | X     | Df | p     | Phi   | OR[RTpW/NoRTpW] | 2.5CI_OR | 97.5CI_OR |
|------------|-------|----|-------|-------|-----------------|----------|-----------|
| odds ratio | 0.298 | 1  | 0.585 | 0.062 | 1.422           | 0.528    | 3.894     |

*Note:*

Expected counts < 5 : 0% of cells

Figure S10: Arterial Hypertension

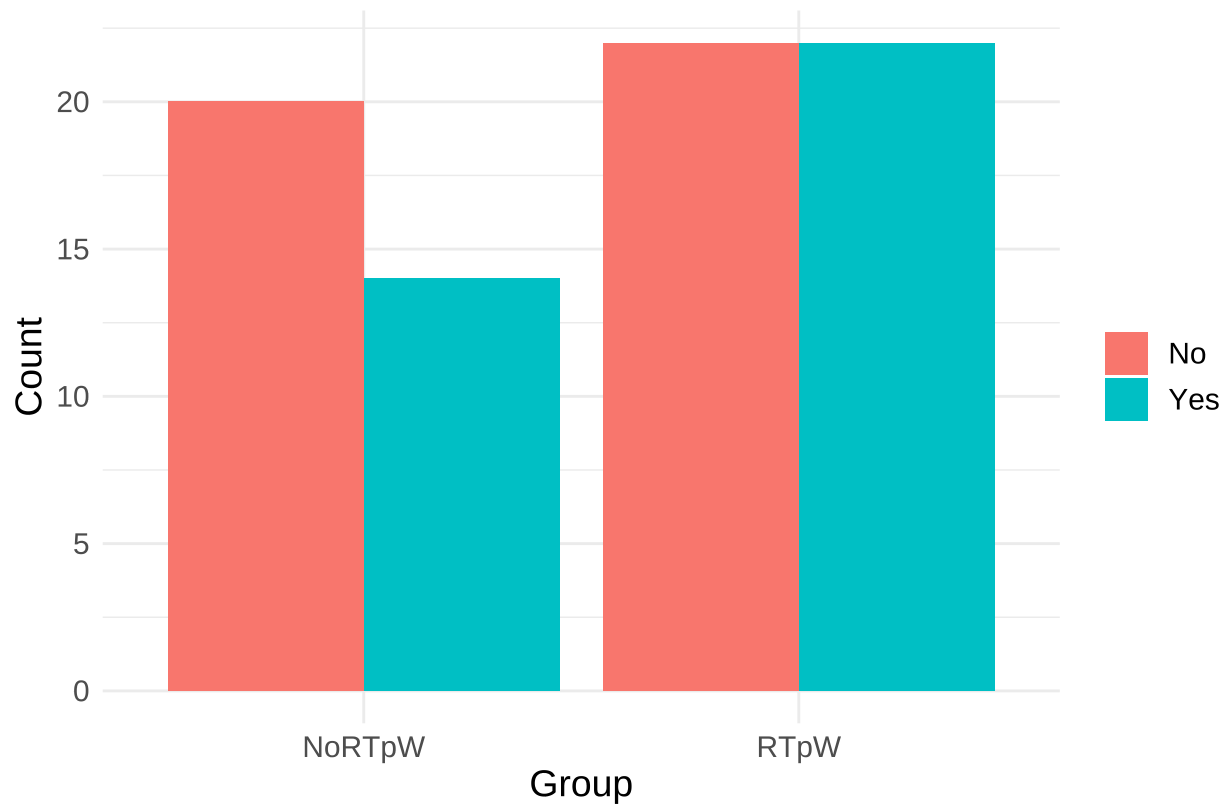

Note: Bar plot of Arterial Hypertension distribution between groups

## 2.11 Hyperlipidemia

Table S11: Pearson's Chi-squared test with Yates' continuity correction

|            | X     | Df | p     | Phi   | OR[RTpW/NoRTpW] | 2.5CI_OR | 97.5CI_OR |
|------------|-------|----|-------|-------|-----------------|----------|-----------|
| odds ratio | 6.757 | 1  | 0.009 | 0.287 | 0.218           | 0.056    | 0.711     |

*Note:*

Expected counts < 5 : 0% of cells

Figure S11: Hyperlipidemia

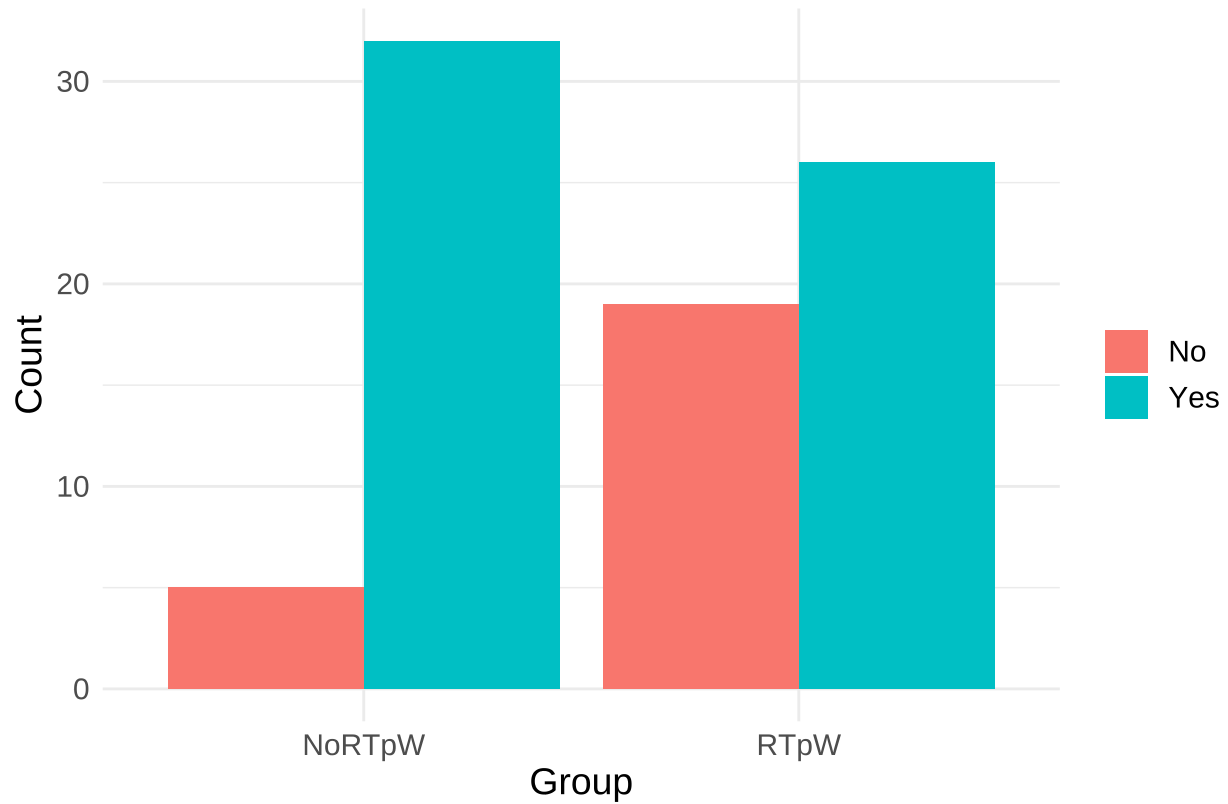

Note: Bar plot of Hyperlipidemia distribution between groups



## 2.12 Antilipid before Stroke

Table S12: Fisher's Exact Test for Count Data

|            | X     | Df | p     | Phi   | OR[RTpW/NoRTpW] | 2.5CI_OR | 97.5CI_OR |
|------------|-------|----|-------|-------|-----------------|----------|-----------|
| odds ratio | 0.015 | 1  | 0.902 | 0.013 | 0.736           | 0.155    | 3.481     |

*Note:*

Expected counts < 5 : 25% of cells

Figure S12: Antilipid before stroke

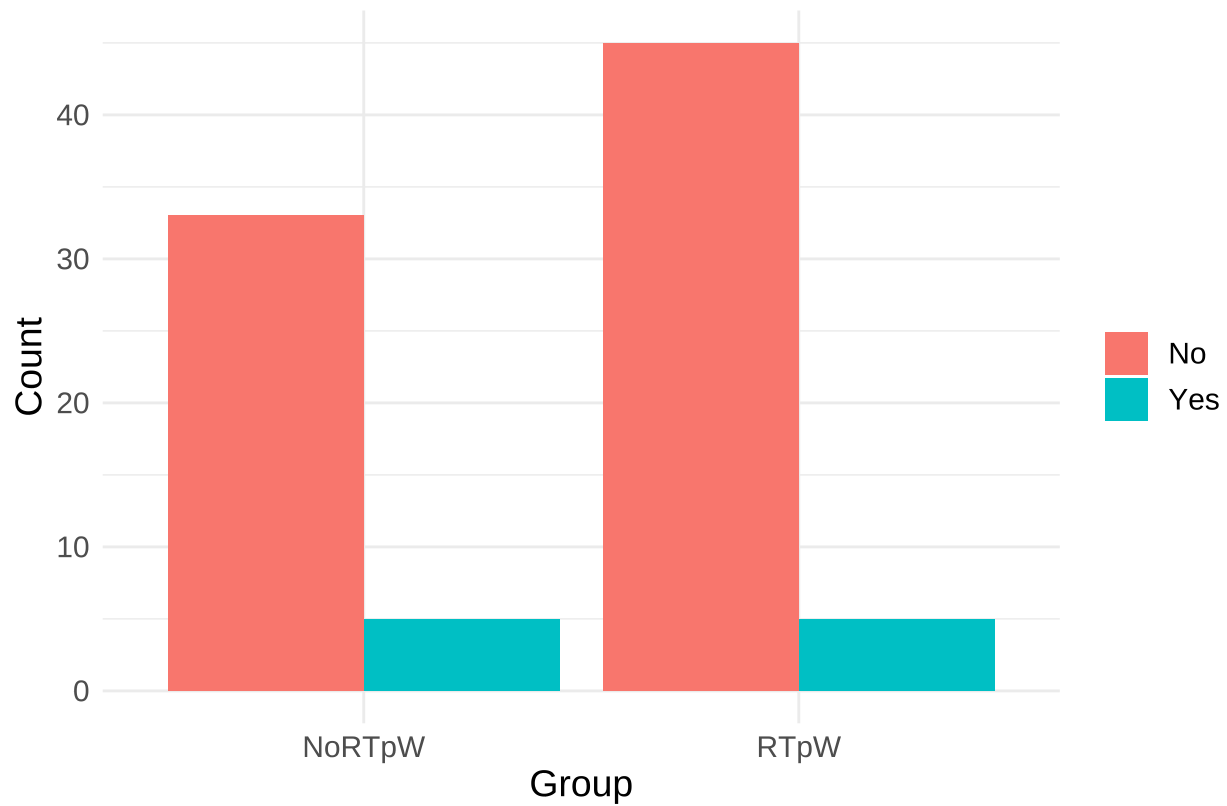

Note: Bar plot of Antilipid before stroke distribution between groups

## 2.13 Antilipid at Discharge

Table S13: Fisher's Exact Test for Count Data

|            | X    | Df | p     | Phi   | OR[RTpW/NoRTpW] | 2.5CI_OR | 97.5CI_OR |
|------------|------|----|-------|-------|-----------------|----------|-----------|
| odds ratio | 1.52 | 1  | 0.218 | 0.131 | 0.295           | 0.029    | 1.613     |

*Note:*

Expected counts < 5 : 25% of cells

Figure S13: Antilipid at discharge

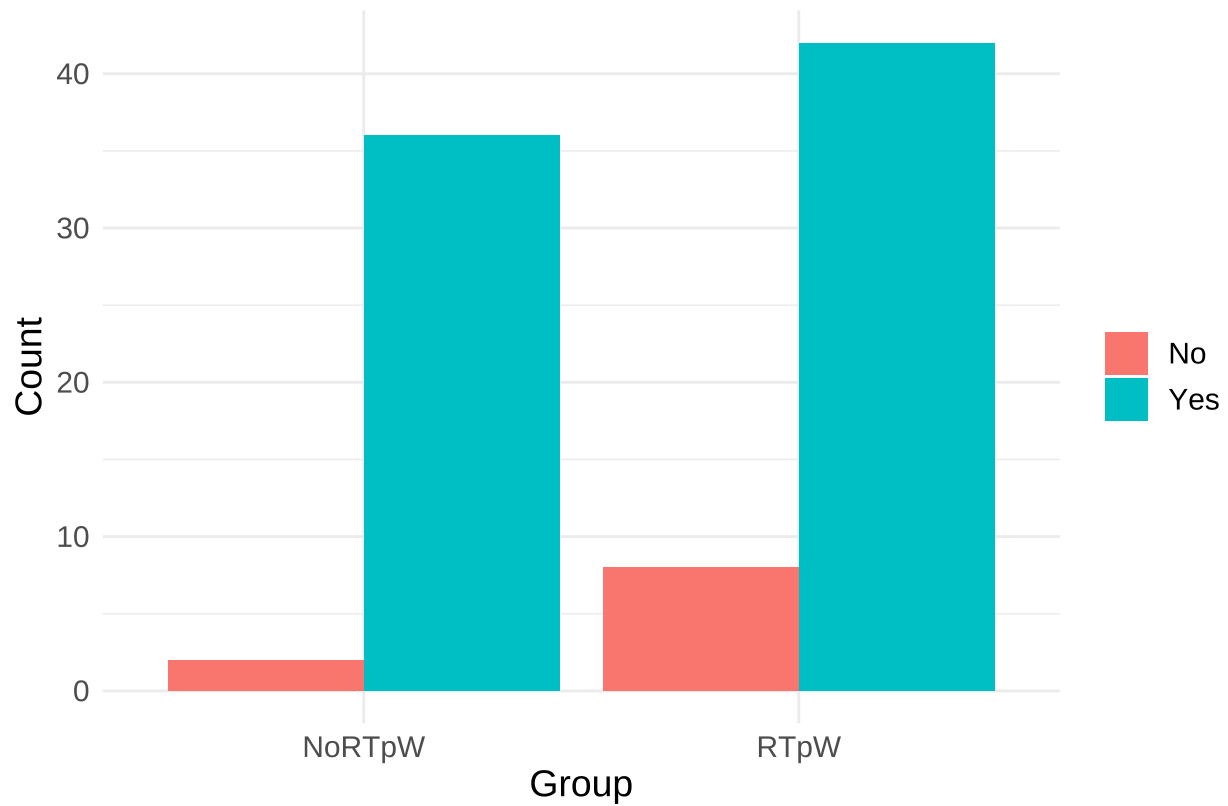

Note: Bar plot of Antilipid at discharge distribution between groups

## 2.14 Lesion Site

Table S14: Pearson's Chi-squared test with Yates' continuity correction

| X     | Df | p     | Cramers_V |
|-------|----|-------|-----------|
| 4.802 | 2  | 0.091 | 0.236     |

*Note:*

Expected counts < 5 : 0% of cells

Figure S14: Lesion Site

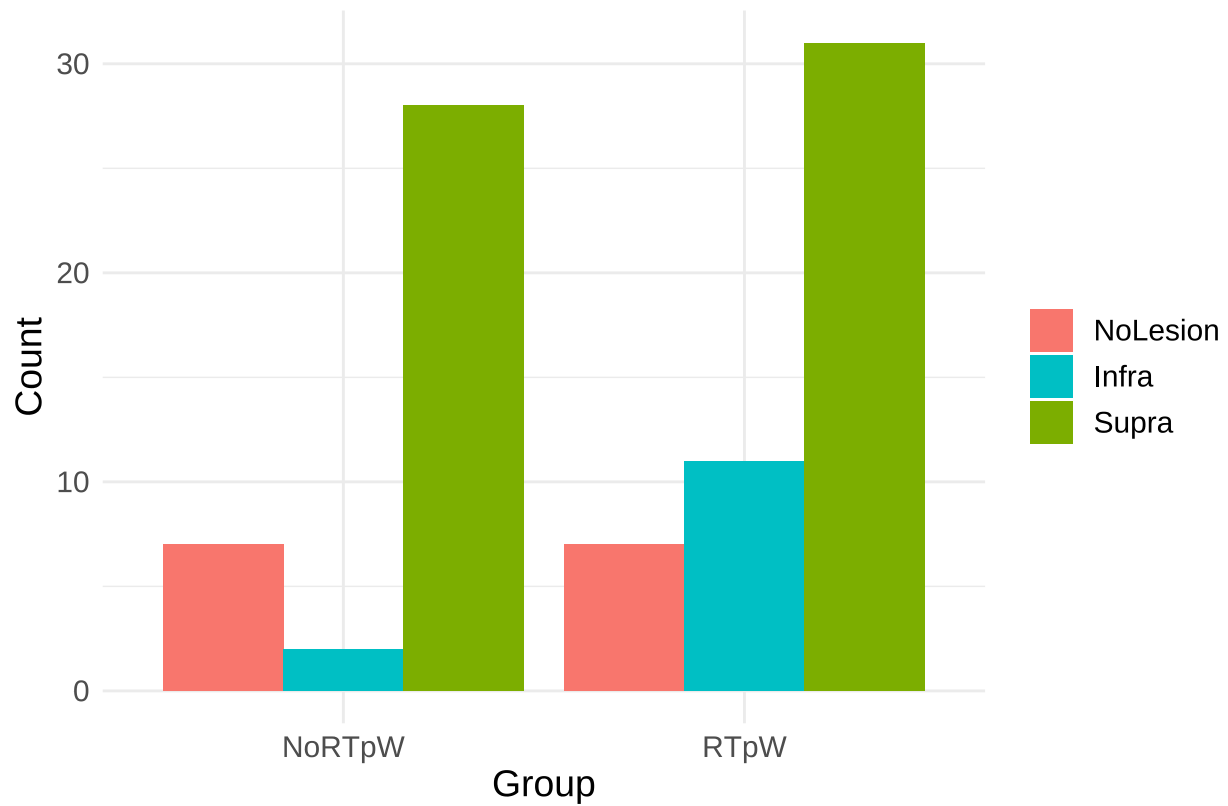

Note: Bar plot of Lesion Site distribution between groups

## 2.15 Thyroid-Stimulating Hormone (TSH)

Table S15: Wilcoxon rank sum test with continuity correction

| Stat | p     | z      | r     | 2.5CI | 97.5CI |
|------|-------|--------|-------|-------|--------|
| 211  | 0.927 | -0.092 | 0.011 | -0.64 | 0.82   |

Figure S15: Thyroid-Stimulating Hormone

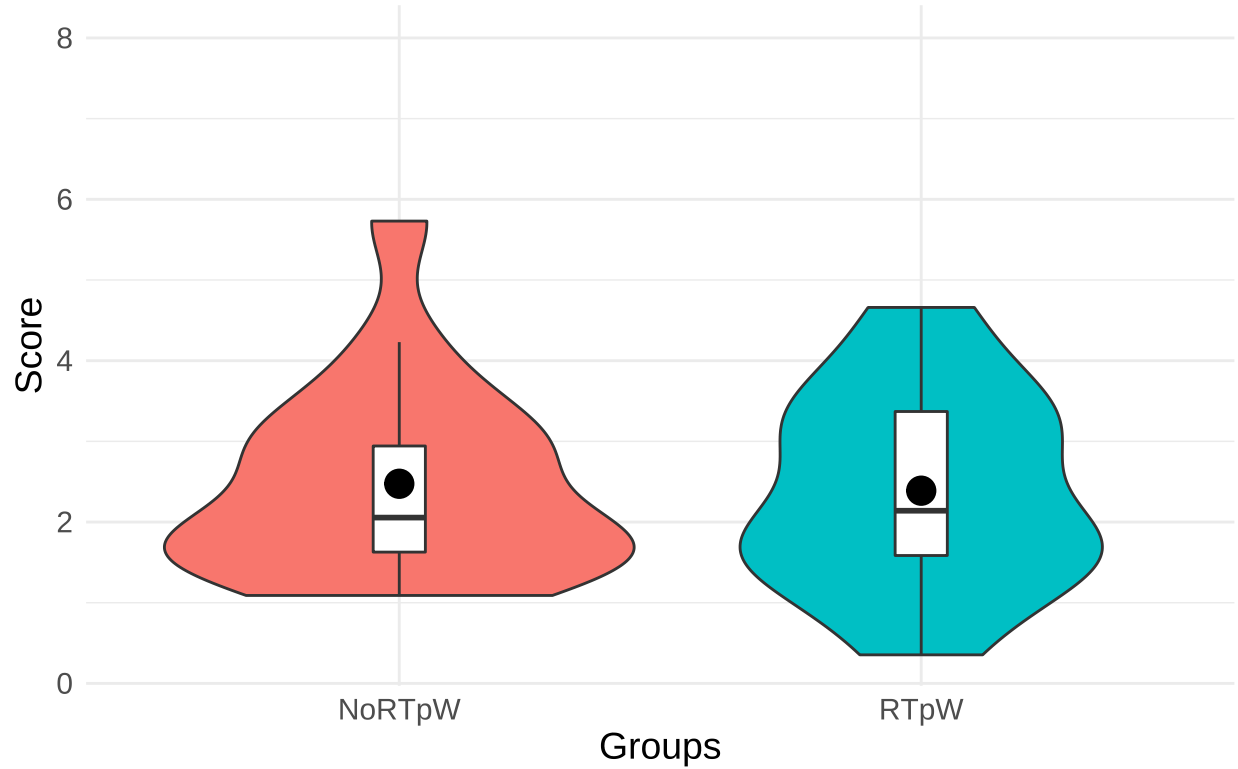

Note: Violin plot of Thyroid-Stimulating Hormone (TSH) distribution between groups  
[\*]p<.05; [\*\*]p<.01; [\*\*\*]p<.001

## 2.16 Duration of Hospitalization

Table S16: Wilcoxon rank sum test with continuity correction

| Stat | p     | z      | r    | 2.5CI  | 97.5CI |
|------|-------|--------|------|--------|--------|
| 836  | 0.092 | -1.687 | 0.18 | -0.175 | 1.749  |

Figure S16: Duration hospitalization

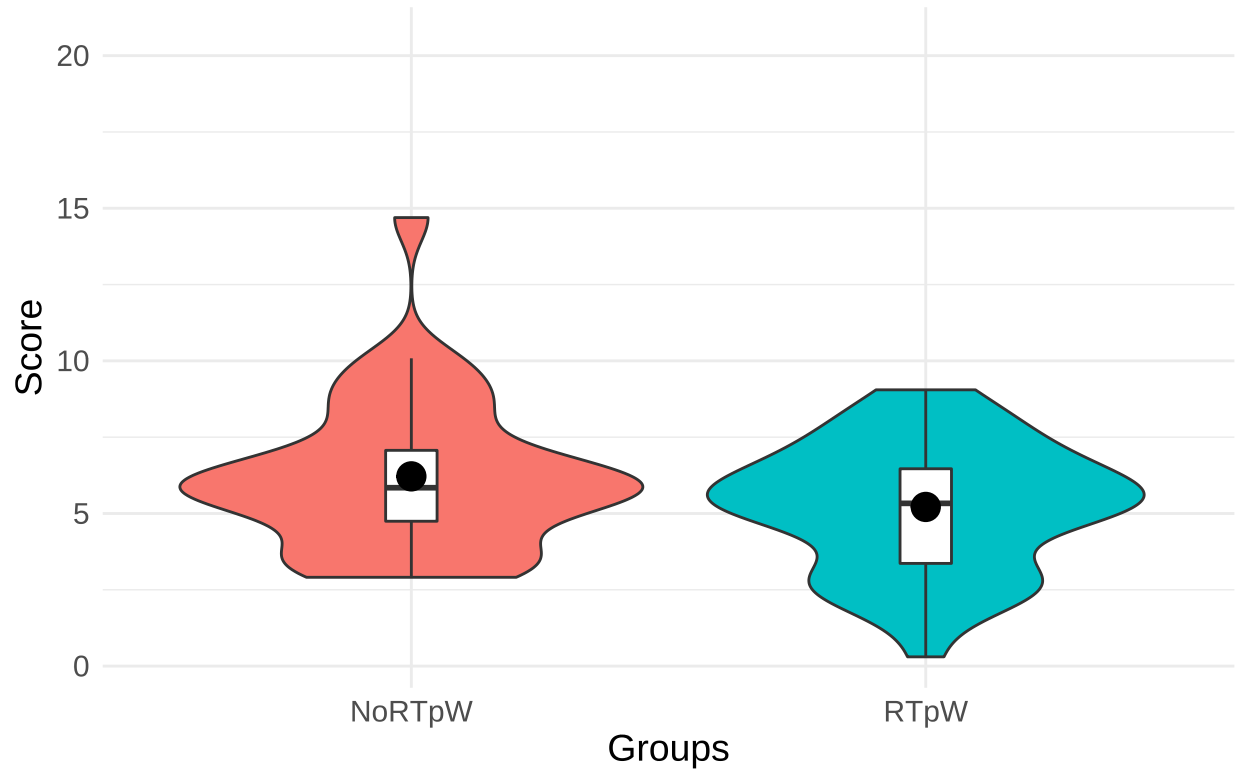

Note: Violin plot of Duration hospitalization distribution between groups  
[\*]p<.05; [\*\*]p<.01; [\*\*\*]p<.001

## 2.17 Age

Table S17: Wilcoxon rank sum test with continuity correction

| Stat | p    | z      | r    | 2.5CI | 97.5CI |
|------|------|--------|------|-------|--------|
| 1006 | 0.64 | -0.468 | 0.05 | -3    | 4      |

Figure S17: Age

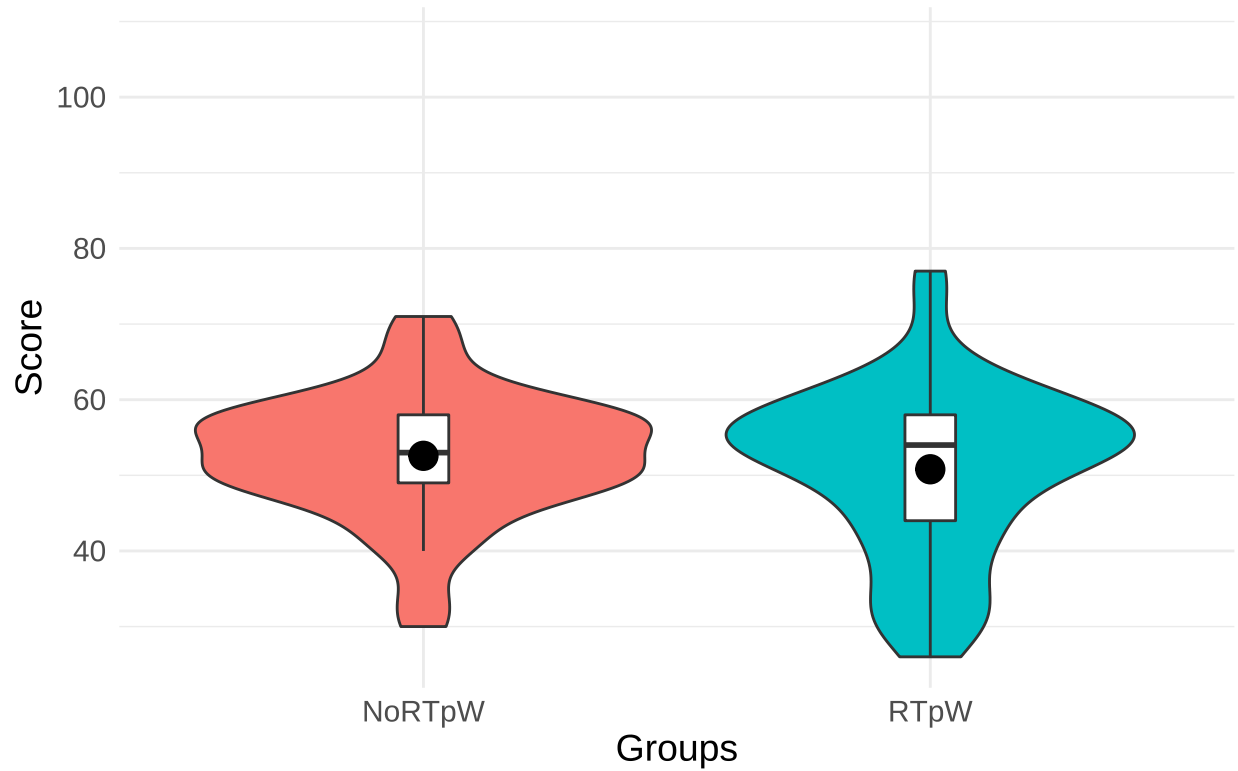

Note: Violin plot of Age distribution between groups  
[\*]p<.05; [\*\*]p<.01; [\*\*\*]p<.001

## 2.18 BMI

Table S18: Wilcoxon rank sum test with continuity correction

| Stat | p     | z      | r     | 2.5CI | 97.5CI |
|------|-------|--------|-------|-------|--------|
| 1058 | 0.365 | -0.906 | 0.097 | -1.1  | 3.3    |

Figure S18: BMI

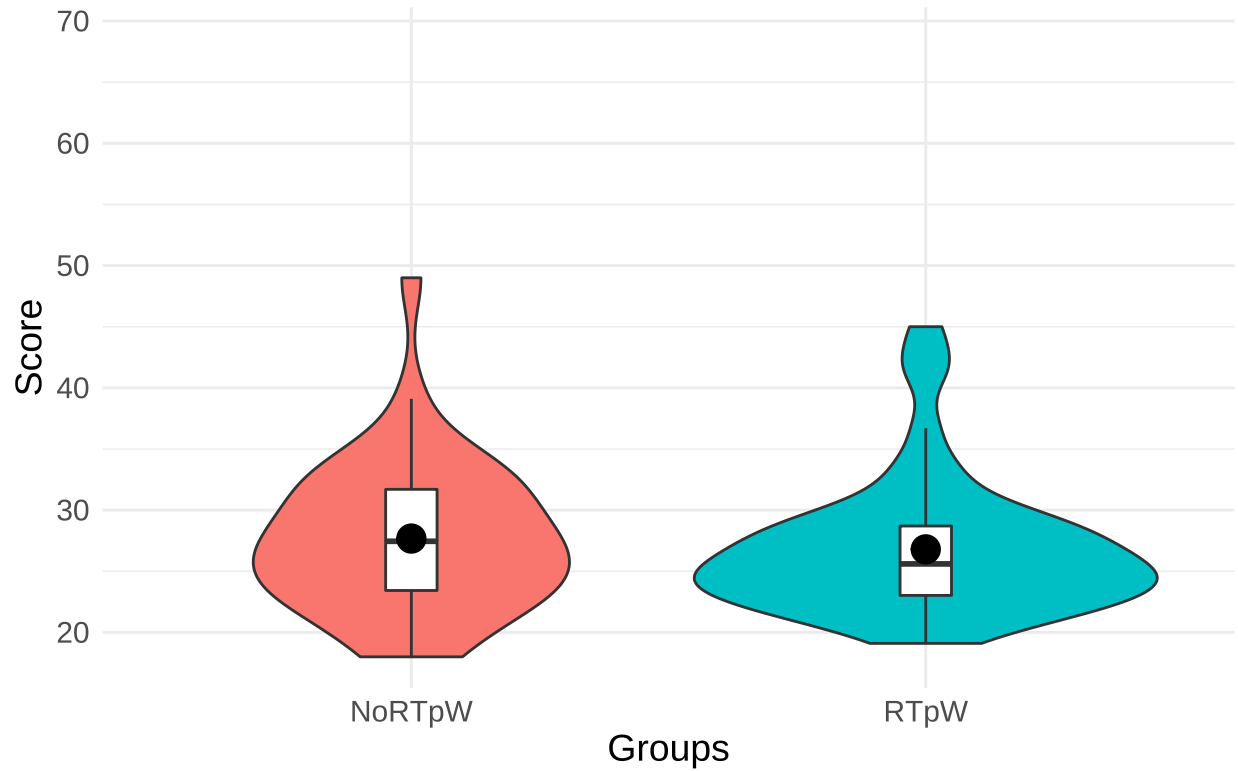

Note: Violin plot of BMI distribution between groups  
[\*]p<.05; [\*\*]p<.01; [\*\*\*]p<.001

## 2.19 LDL-Cholesterol (LDL-C)

Table S19: Welch Two Sample t-test

| t     | Df | p     | HedgesG | 2.5CI  | 97.5CI |
|-------|----|-------|---------|--------|--------|
| 0.305 | 82 | 0.761 | 0.066   | -0.368 | 0.502  |

Figure S19: LDL-Cholesterol

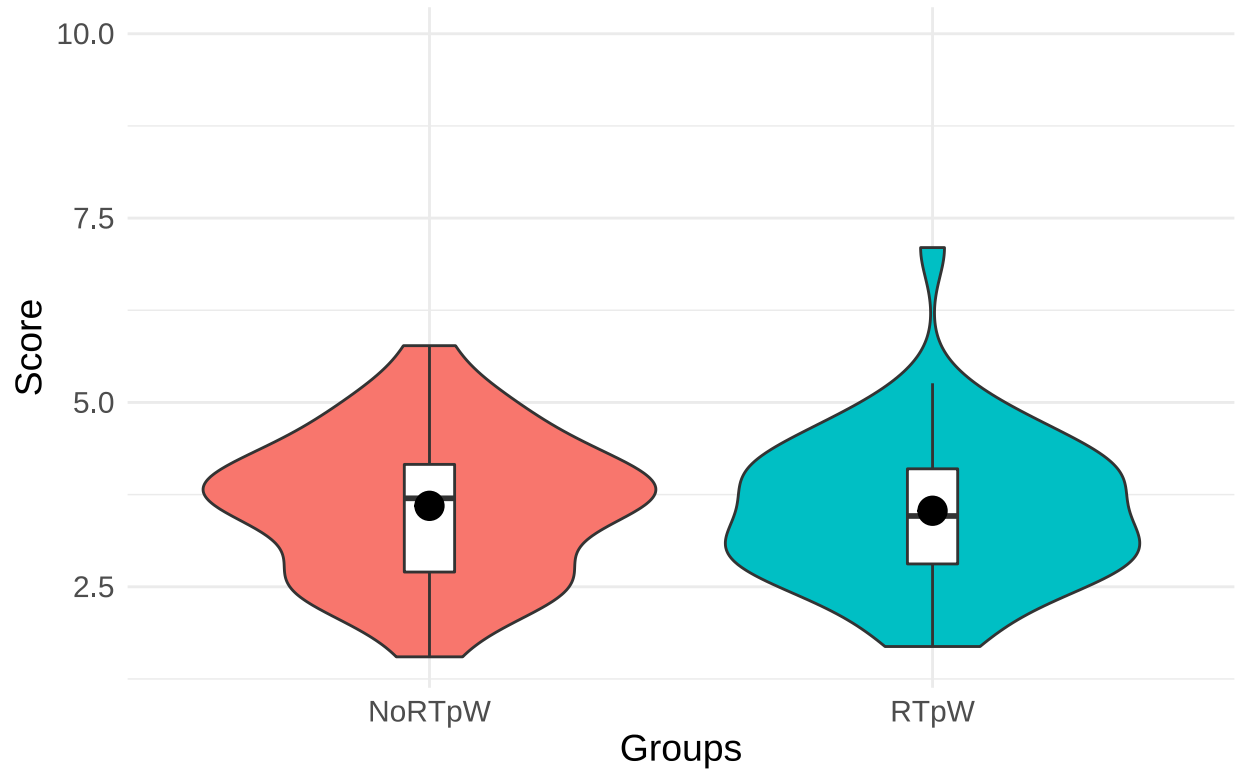

Note: Violin plot of LDL-Cholesterol (LDL-C) distribution between groups  
[\*]p<.05; [\*\*]p<.01; [\*\*\*]p<.001



## 2.20 Total Cholesterol

Table S20: Welch Two Sample t-test

| t      | Df | p    | HedgesG | 2.5CI  | 97.5CI |
|--------|----|------|---------|--------|--------|
| -0.063 | 81 | 0.95 | -0.014  | -0.475 | 0.446  |

Figure S20: Total Cholesterol

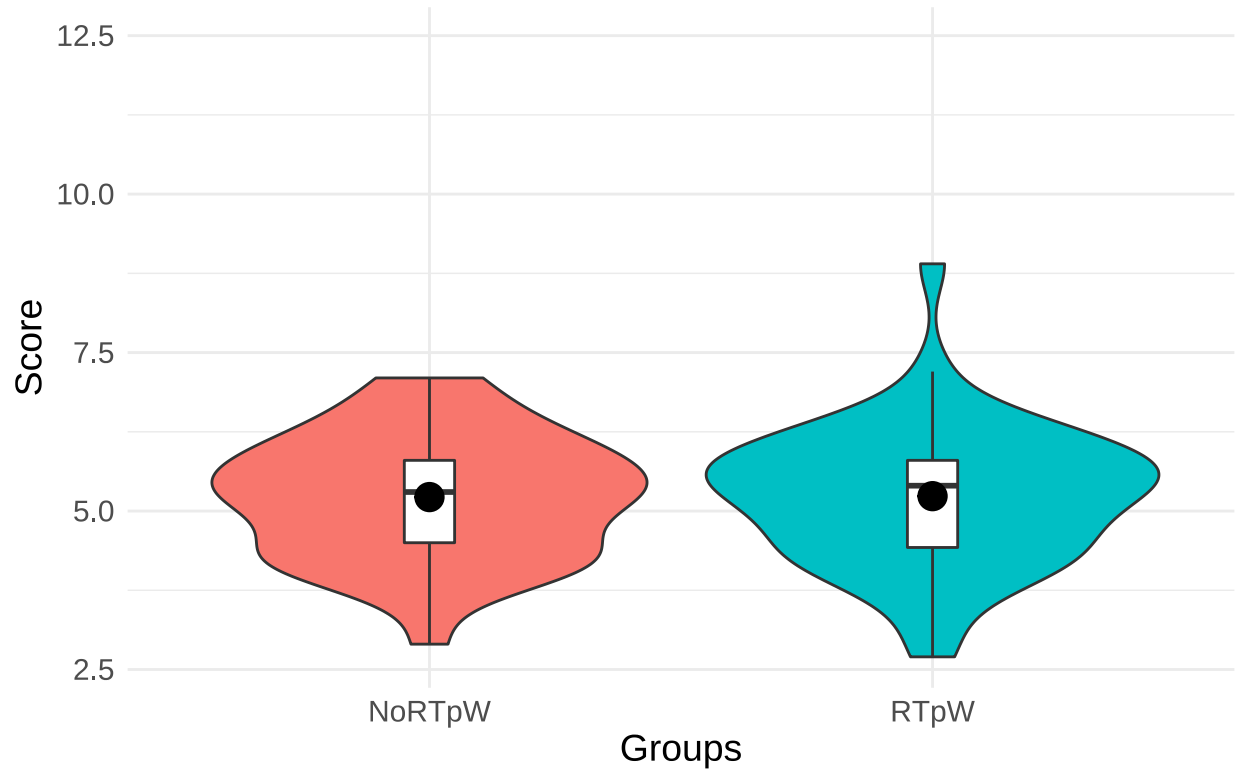

Note: Violin plot of Total Cholesterol distribution between groups  
[\*]p<.05; [\*\*]p<.01; [\*\*\*]p<.001

### 3 ROBUST ANOVAs

#### 3.1 NIHSS

Table S21: ROBUST ANOVA using trimmed means

|             | F      | Df1 | Df2    | p     |
|-------------|--------|-----|--------|-------|
| Between     | 4.738  | 1   | 19.998 | 0.042 |
| Within      | 11.485 | 1   | 21.420 | 0.003 |
| Interaction | 2.139  | 1   | 21.420 | 0.158 |

Figure S21: NIHSS

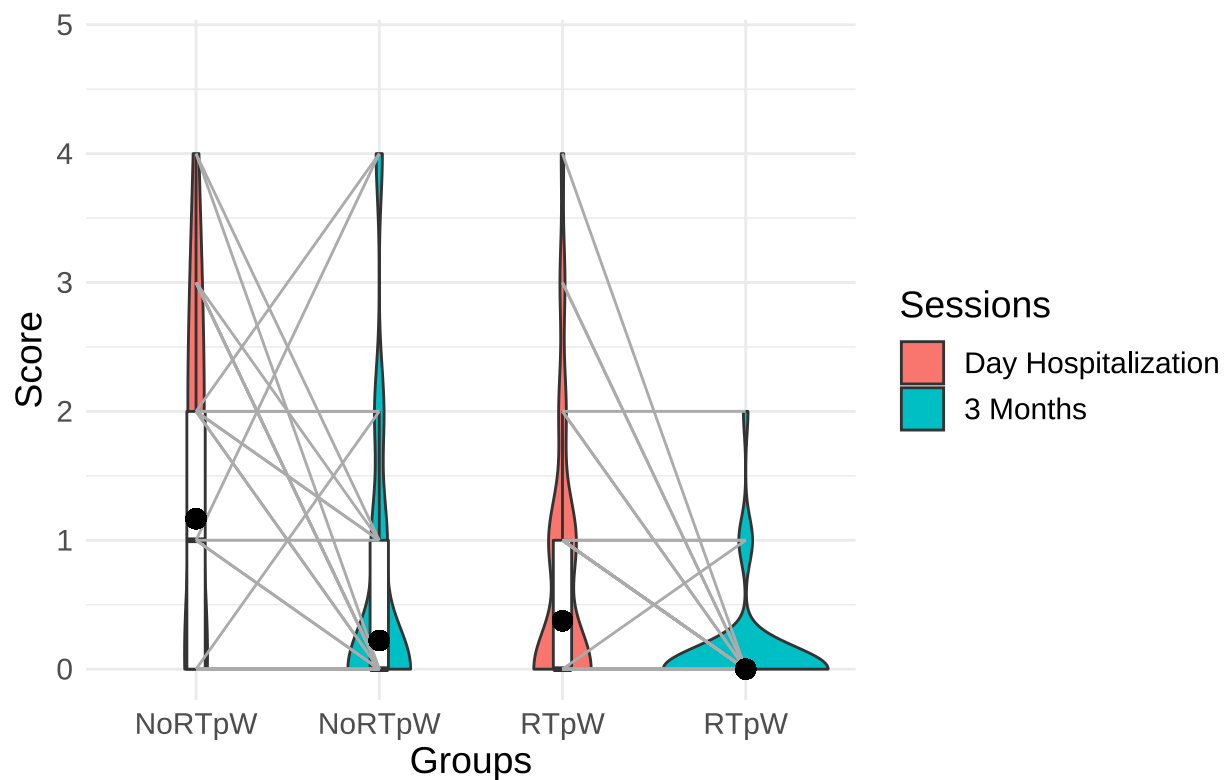

Note: Violin plot of NIHSS distribution between groups  
 [\*]p<.05; [\*\*]p<.01; [\*\*\*]p<.001

### 3.2 Montreal Cognitive Assessment (MoCA)

Table S22: ROBUST ANOVA using trimmed means

|             | F     | Df1 | Df2   | p     |
|-------------|-------|-----|-------|-------|
| Between     | 0.819 | 1   | 39.41 | 0.371 |
| Within      | 2.029 | 1   | 39.97 | 0.162 |
| Interaction | 0.249 | 1   | 39.97 | 0.621 |

Figure S22: Montreal Cognitive Assessment (MoCA)

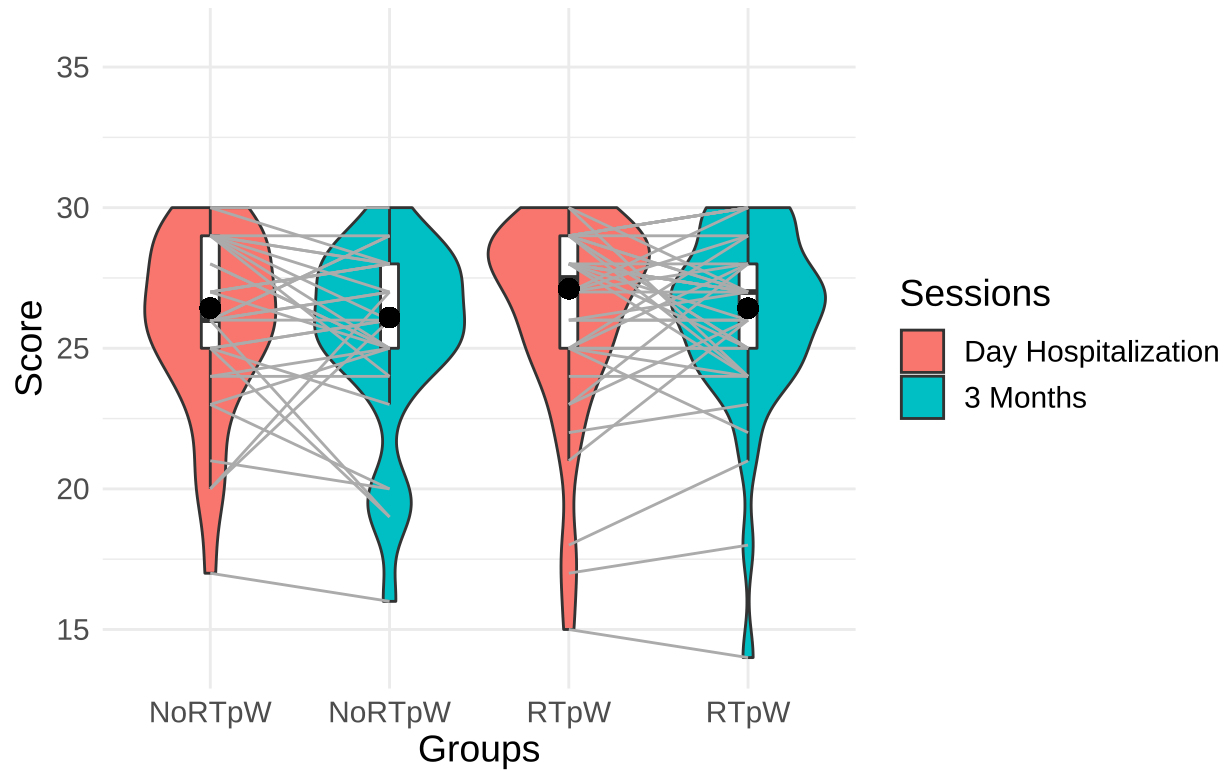

Note: Violin plot of Montreal Cognitive Assessment (MoCA) distribution between groups:  
 [\*]p<.05; [\*\*]p<.01; [\*\*\*]p<.001

### 3.3 Hospital Anxiety and Depression scale (HAD)

Table S23: ROBUST ANOVA using trimmed means

|             | F     | Df1 | Df2    | p     |
|-------------|-------|-----|--------|-------|
| Between     | 8.380 | 1   | 38.265 | 0.006 |
| Within      | 2.308 | 1   | 33.097 | 0.138 |
| Interaction | 9.077 | 1   | 33.097 | 0.005 |

Table S24: Yuen's test using trimmed means

|                                | t      | Df     | p     | d     | 2.5CI  | 97.5CI |
|--------------------------------|--------|--------|-------|-------|--------|--------|
| RTpW:onset Vs NoRTpW:onset (B) | 0.846  | 36.754 | 0.403 | 0.140 | -1.794 | 4.365  |
| RTpW:3m Vs NoRTpW:3m (B)       | 3.742  | 37.109 | 0.001 | 0.567 | 3.145  | 10.569 |
| RTpW:onset Vs RTpW:3m (W)      | 9.154  | 41.000 | 0.000 | 0.878 | 5.474  | 8.573  |
| NoRTpW:onset Vs NoRTpW:3m(W)   | 10.738 | 39.000 | 0.000 | 0.925 | 8.867  | 12.983 |

Figure S23: Hospital Anxiety and Depression scale (HAD)

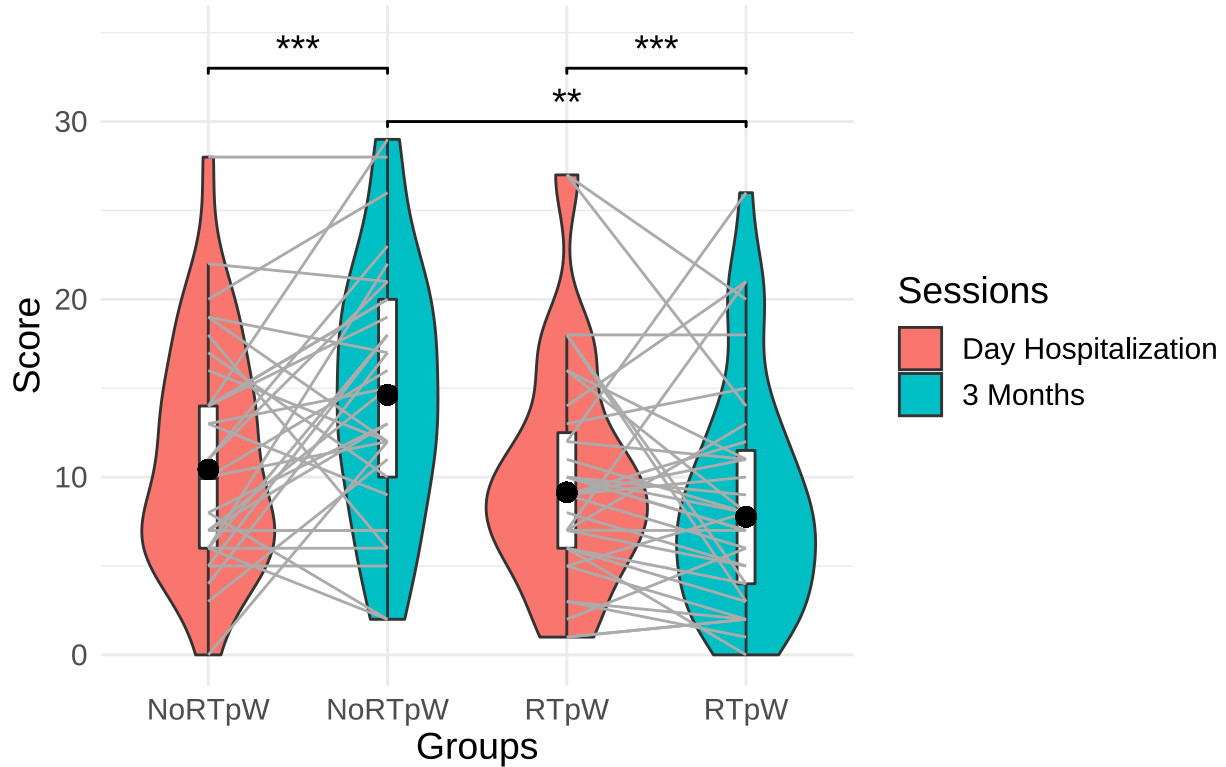

Note: Violin plot of Hospital Anxiety and Depression scale (HAD) distribution between g  
[\*]p<.05; [\*\*]p<.01; [\*\*\*]p<.001

### 3.4 Fatigue Impact Scale (FIS) Cognitive

Table S25: ROBUST ANOVA using trimmed means

|             | F      | Df1 | Df2    | p     |
|-------------|--------|-----|--------|-------|
| Between     | 16.720 | 1   | 31.062 | 0.000 |
| Within      | 17.423 | 1   | 31.471 | 0.000 |
| Interaction | 13.875 | 1   | 31.471 | 0.001 |

Table S26: Yuen's test using trimmed means

|                                | t     | Df     | p     | d     | 2.5CI  | 97.5CI |
|--------------------------------|-------|--------|-------|-------|--------|--------|
| RTpW:onset Vs NoRTpW:onset (B) | 1.240 | 28.603 | 0.225 | 0.242 | -6.203 | 25.282 |
| RTpW:3m Vs NoRTpW:3m (B)       | 5.471 | 33.839 | 0.000 | 0.699 | 26.565 | 57.977 |
| RTpW:onset Vs RTpW:3m (W)      | 6.465 | 37.000 | 0.000 | 0.750 | 14.599 | 27.927 |
| NoRTpW:onset Vs NoRTpW:3m(W)   | 8.248 | 33.000 | 0.000 | 0.848 | 35.423 | 58.618 |

Figure S24: Fatigue Impact Scale (FIS) Cognitive

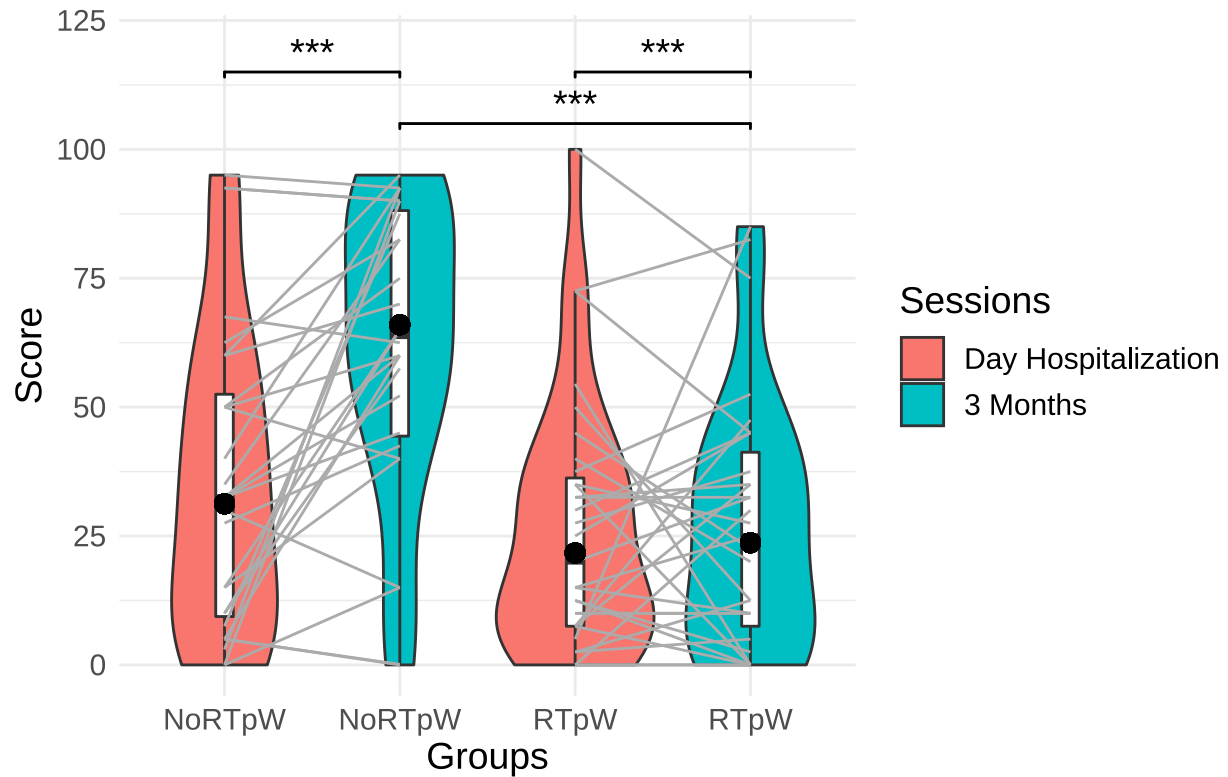

Note: Violin plot of Fatigue Impact Scale (FIS) Cognitive distribution between groups  
 [\*]p<.05; [\*\*]p<.01; [\*\*\*]p<.001

### 3.5 FIS Physical

Table S27: ROBUST ANOVA using trimmed means

|             | F     | Df1 | Df2    | p     |
|-------------|-------|-----|--------|-------|
| Between     | 9.650 | 1   | 33.115 | 0.004 |
| Within      | 8.516 | 1   | 33.716 | 0.006 |
| Interaction | 5.281 | 1   | 33.716 | 0.028 |

Table S28: Yuen's test using trimmed means

|                                | t      | Df     | p     | d     | 2.5CI  | 97.5CI |
|--------------------------------|--------|--------|-------|-------|--------|--------|
| RTpW:onset Vs NoRTpW:onset (B) | 0.873  | 31.253 | 0.389 | 0.157 | -8.633 | 21.557 |
| RTpW:3m Vs NoRTpW:3m (B)       | 3.948  | 25.728 | 0.001 | 0.617 | 13.373 | 42.450 |
| RTpW:onset Vs RTpW:3m (W)      | 7.588  | 37.000 | 0.000 | 0.846 | 20.938 | 36.194 |
| NoRTpW:onset Vs NoRTpW:3m(W)   | 11.948 | 33.000 | 0.000 | 0.913 | 39.709 | 56.008 |

Figure S25: FIS Physical

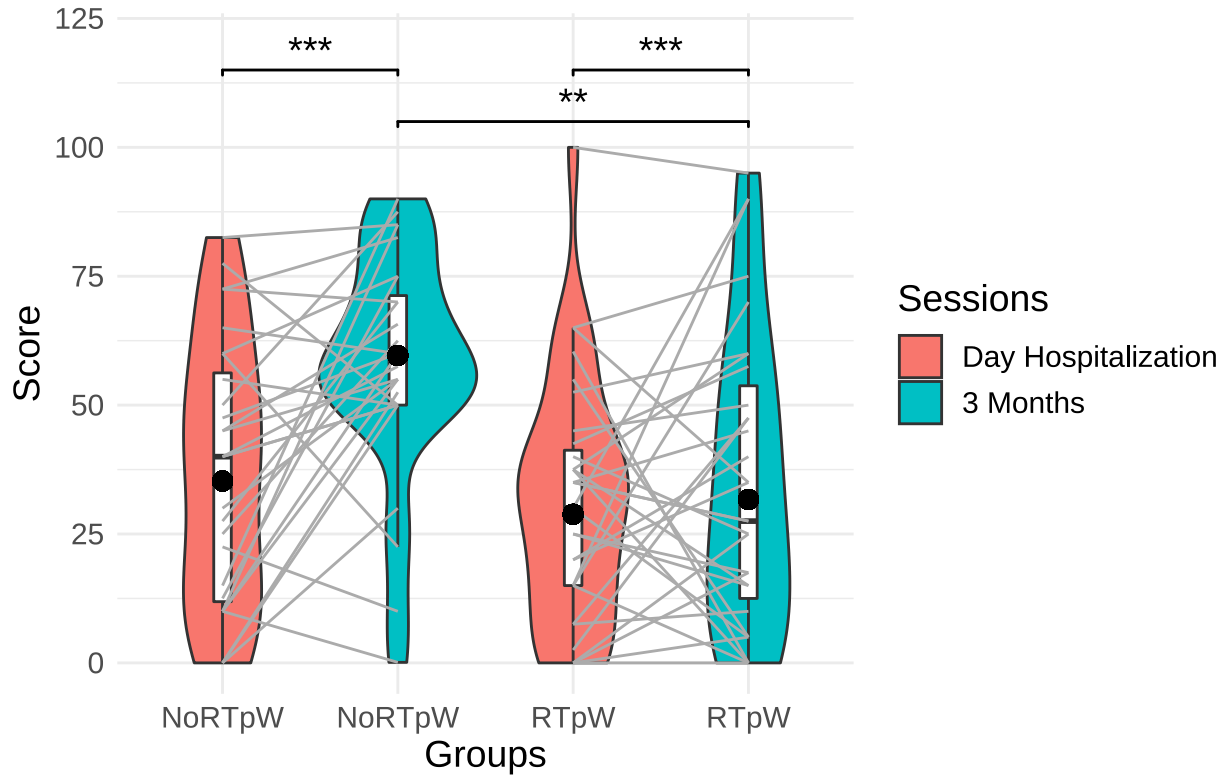

Note: Violin plot of FIS Physical distribution between groups  
 [\*]p<.05; [\*\*]p<.01; [\*\*\*]p<.001

### 3.6 FIS Psychosocial

Table S29: ROBUST ANOVA using trimmed means

|             | F      | Df1 | Df2    | p     |
|-------------|--------|-----|--------|-------|
| Between     | 21.809 | 1   | 33.846 | 0.000 |
| Within      | 13.847 | 1   | 33.980 | 0.001 |
| Interaction | 22.714 | 1   | 33.980 | 0.000 |

Table S30: Yuen's test using trimmed means

|                                | t      | Df     | p     | d     | 2.5CI  | 97.5CI |
|--------------------------------|--------|--------|-------|-------|--------|--------|
| RTpW:onset Vs NoRTpW:onset (B) | 1.226  | 33.397 | 0.229 | 0.242 | -4.308 | 17.400 |
| RTpW:3m Vs NoRTpW:3m (B)       | 6.199  | 33.768 | 0.000 | 0.752 | 24.973 | 49.343 |
| RTpW:onset Vs RTpW:3m (W)      | 7.969  | 37.000 | 0.000 | 0.869 | 16.544 | 27.825 |
| NoRTpW:onset Vs NoRTpW:3m(W)   | 10.946 | 33.000 | 0.000 | 0.897 | 36.118 | 52.610 |

Figure S26: FIS Psychosocial

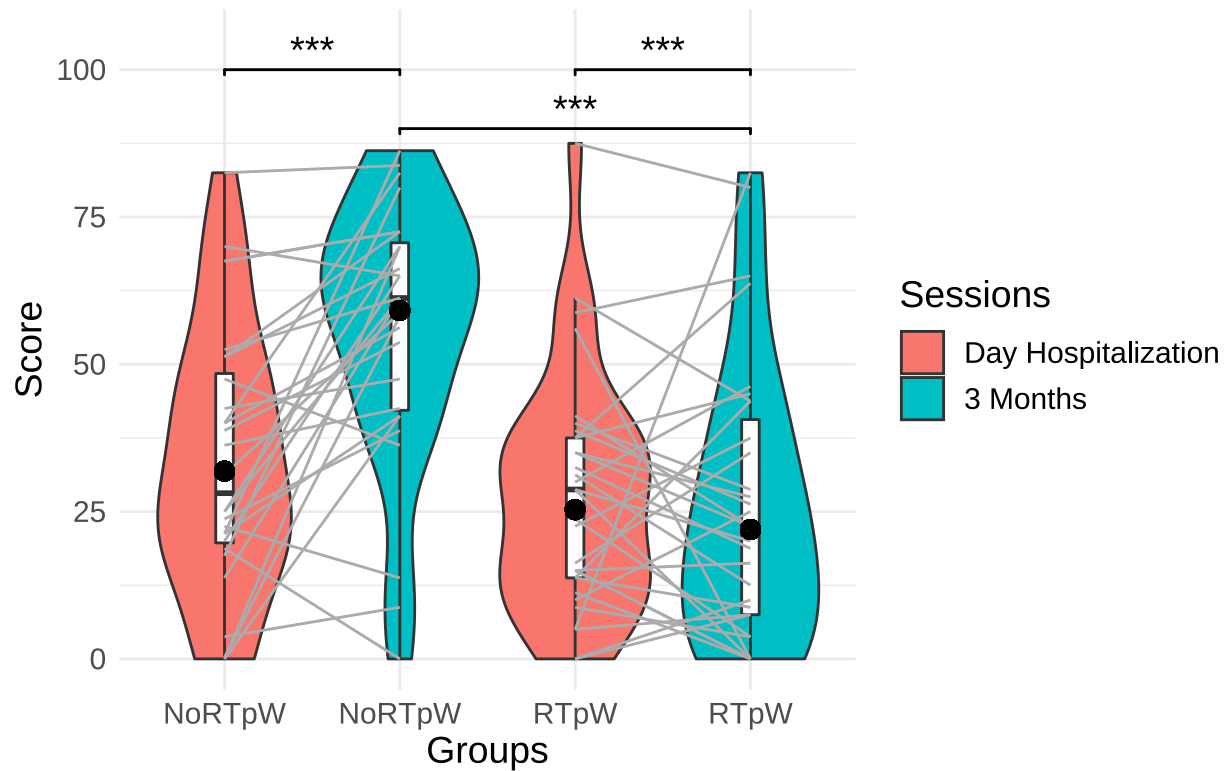

Note: Violin plot of FIS Psychosocial distribution between groups  
 [\*]p<.05; [\*\*]p<.01; [\*\*\*]p<.001

## 4 DESCRIPTIVES AND STATISTICAL TESTS SUMMARY (extended Table 1 from manuscript)

Table S31: Extended table 1 from manuscript

|                                                      | Overall      |        |           | NoRTpW       |        |           | RTpW         |        |           | Statistics  |          |       |             |             |             |             |
|------------------------------------------------------|--------------|--------|-----------|--------------|--------|-----------|--------------|--------|-----------|-------------|----------|-------|-------------|-------------|-------------|-------------|
|                                                      | TMean/Median | SD/IQR | N         | TMean/Median | SD/IQR | N         | TMean/Median | SD/IQR | N         | Stat        | Df       | z     | p           | ES/OR       | 2.25CI      | 97.5CI      |
| <i>Demographics</i>                                  |              |        |           |              |        |           |              |        |           |             |          |       |             |             |             |             |
| Gender:Male                                          |              |        | 62        |              |        | 25        |              |        | 37        |             |          |       |             |             |             |             |
| Gender:Female                                        |              |        | 26        |              |        | 13        |              |        | 13        | 0.36        | 1        |       | 0.55        | 0.68        | 0.24        | 1.88        |
| Type of Work:Blue collar                             |              |        | 55        |              |        | 21        |              |        | 34        |             |          |       |             |             |             |             |
| Type of Work:White collar                            |              |        | 33        |              |        | 17        |              |        | 16        | 1.00        | 1        |       | 0.32        | 0.58        | 0.22        | 1.52        |
| Living situation:Alone                               |              |        | 23        |              |        | 12        |              |        | 11        |             |          |       |             |             |             |             |
| Living situation:Not alone                           |              |        | 65        |              |        | 26        |              |        | 39        | 0.59        | 1        |       | 0.44        | 1.63        | 0.56        | 4.76        |
| Age                                                  | 54.00        | 10.50  | 88        | 53.00        | 9.00   | 38        | 54.00        | 14.00  | 50        | 1006.00     |          | -0.47 | 0.64        | 0.05        | -3.00       | 4.00        |
| <i>Cardiovascular risk factors and comorbidities</i> |              |        |           |              |        |           |              |        |           |             |          |       |             |             |             |             |
| Hypertension:No                                      |              |        | 42        |              |        | 20        |              |        | 22        |             |          |       |             |             |             |             |
| Hypertension:Yes                                     |              |        | 36        |              |        | 14        |              |        | 22        | 0.30        | 1        |       | 0.58        | 1.42        | 0.53        | 3.89        |
| <b>Hyperlipidemia:No</b>                             |              |        | <b>24</b> |              |        | <b>5</b>  |              |        | <b>19</b> |             |          |       |             |             |             |             |
| <b>Hyperlipidemia:Yes</b>                            |              |        | <b>58</b> |              |        | <b>32</b> |              |        | <b>26</b> | <b>6.76</b> | <b>1</b> |       | <b>0.01</b> | <b>0.22</b> | <b>0.06</b> | <b>0.71</b> |
| Smoking:No                                           |              |        | 45        |              |        | 20        |              |        | 25        |             |          |       |             |             |             |             |
| Smoking:Yes                                          |              |        | 29        |              |        | 14        |              |        | 15        | 0.01        | 1        |       | 0.93        | 0.86        | 0.30        | 2.43        |
| LDL Cholesterol                                      | 3.56         | 0.99   | 84        | 3.60         | 0.97   | 37        | 3.53         | 1.02   | 47        | 0.31        | 82       |       | 0.76        | 0.07        | -0.37       | 0.50        |
| Total Cholesterol                                    | 5.23         | 1.04   | 83        | 5.22         | 0.98   | 37        | 5.23         | 1.10   | 46        | -0.06       | 81       |       | 0.95        | -0.01       | -0.48       | 0.45        |
| BMI                                                  | 25.85        | 6.32   | 88        | 27.45        | 8.28   | 38        | 25.60        | 5.68   | 50        | 1058.00     |          | -0.91 | 0.37        | 0.10        | -1.10       | 3.30        |
| TSH                                                  | 2.07         | 1.67   | 41        | 2.05         | 1.31   | 18        | 2.14         | 1.79   | 23        | 211.00      |          | -0.09 | 0.93        | 0.01        | -0.64       | 0.82        |
| <i>Medications prior to stroke onset</i>             |              |        |           |              |        |           |              |        |           |             |          |       |             |             |             |             |
| Antilipid pre:No                                     |              |        | 78        |              |        | 33        |              |        | 45        |             |          |       |             |             |             |             |
| Antilipid pre:Yes                                    |              |        | 10        |              |        | 5         |              |        | 5         | 0.02        | 1        |       | 0.90        | 0.74        | 0.16        | 3.48        |
| Antilipid at discharge:No                            |              |        | 10        |              |        | 2         |              |        | 8         |             |          |       |             |             |             |             |
| Antilipid at discharge:Yes                           |              |        | 78        |              |        | 36        |              |        | 42        | 1.52        | 1        |       | 0.22        | 0.30        | 0.03        | 1.61        |
| <i>Cerebrovascular event</i>                         |              |        |           |              |        |           |              |        |           |             |          |       |             |             |             |             |
| Event type:TIA                                       |              |        | 8         |              |        | 4         |              |        | 4         |             |          |       |             |             |             |             |
| Event type:MIS                                       |              |        | 80        |              |        | 34        |              |        | 46        | 0.00        | 1        |       | 0.97        | 1.35        | 0.23        | 7.79        |
| Discharge destination: <sup>1</sup>                  |              |        | 68        |              |        | 30        |              |        | 38        |             |          |       |             |             |             |             |
| Discharge destination: <sup>2</sup>                  |              |        | 6         |              |        | 4         |              |        | 2         | 0.40        | 1        |       | 0.53        | 0.40        | 0.03        | 3.01        |
| Etiology TOAST: <sup>a</sup>                         |              |        | 9         |              |        | 5         |              |        | 4         |             |          |       |             |             |             |             |
| Etiology TOAST: <sup>b</sup>                         |              |        | 18        |              |        | 6         |              |        | 12        |             |          |       |             |             |             |             |
| Etiology TOAST: <sup>c</sup>                         |              |        | 14        |              |        | 6         |              |        | 8         |             |          |       |             |             |             |             |
| Etiology TOAST: <sup>d</sup>                         |              |        | 11        |              |        | 7         |              |        | 4         |             |          |       |             |             |             |             |
| Etiology TOAST: <sup>e</sup>                         |              |        | 7         |              |        | 4         |              |        | 3         |             |          |       |             |             |             |             |
| Etiology TOAST: <sup>f</sup>                         |              |        | 5         |              |        | 1         |              |        | 4         |             |          |       |             |             |             |             |
| Etiology TOAST: <sup>g</sup>                         |              |        | 5         |              |        | 3         |              |        | 2         |             |          |       |             |             |             |             |
| Etiology TOAST: <sup>h</sup>                         |              |        | 3         |              |        | 2         |              |        | 1         |             |          |       |             |             |             |             |
| Etiology TOAST: <sup>i</sup>                         |              |        | 1         |              |        | 0         |              |        | 1         | 6.38        | 8        |       | 0.60        | 0.30        |             |             |
| Duration of hospitalization                          | 5.68         | 2.67   | 74        | 5.84         | 2.32   | 34        | 5.33         | 3.10   | 40        | 836.00      |          | -1.69 | 0.09        | 836.00      | -0.17       | 1.75        |
| NIHSS onset                                          | 0.57         | 0.71   | 77        | 1.10         | 1.00   | 33        | 0.32         | 0.48   | 44        | 4.74        | 1,20     |       | 0.04        |             |             |             |
| NIHSS 3m                                             | 0.00         | 0.00   | 77        | 0.21         | 0.42   | 31        | 0.00         | 0.00   | 46        | 11.48       | 1,21.42  |       | 0.00        |             |             |             |
| NIHSS interaction                                    |              |        |           |              |        |           |              |        |           | 2.14        | 1,21.42  |       | 0.16        |             |             |             |
| <i>Stroke localization</i>                           |              |        |           |              |        |           |              |        |           |             |          |       |             |             |             |             |
| <b>Lesion site:No lesion</b>                         |              |        | <b>14</b> |              |        | <b>7</b>  |              |        | <b>7</b>  |             |          |       |             |             |             |             |



|                                     |              |              |           |              |              |           |              |              |           |              |                |  |             |      |
|-------------------------------------|--------------|--------------|-----------|--------------|--------------|-----------|--------------|--------------|-----------|--------------|----------------|--|-------------|------|
| Lesion site:Infratentorial          |              |              | <b>13</b> |              |              | <b>2</b>  |              |              | <b>11</b> |              |                |  |             |      |
| Lesion site:Supratentorial          |              |              | 59        |              |              | 28        |              |              | 31        | 4.80         | 2              |  | 0.09        | 0.24 |
| <i>Psychological outcomes</i>       |              |              |           |              |              |           |              |              |           |              |                |  |             |      |
| MoCA onset                          | 26.67        | 1.58         | 86        | 26.43        | 1.53         | 37        | 26.84        | 1.70         | 49        | 0.82         | 1,39.41        |  | 0.37        |      |
| MoCA 3m                             | 26.26        | 1.21         | 77        | 26.05        | 1.29         | 34        | 26.44        | 1.28         | 43        | 2.03         | 1,39.97        |  | 0.16        |      |
| MoCA interaction                    |              |              |           |              |              |           |              |              |           | 0.25         | 1,39.97        |  | 0.62        |      |
| <b>HAD onset</b>                    | <b>10.06</b> | <b>3.03</b>  | <b>82</b> | <b>10.32</b> | <b>3.54</b>  | <b>36</b> | <b>9.89</b>  | <b>2.71</b>  | <b>46</b> | <b>8.38</b>  | <b>1,38.27</b> |  | <b>0.01</b> |      |
| HAD 3m                              | 10.65        | 3.94         | 71        | 14.27        | 4.18         | 34        | 7.52         | 2.86         | 37        | 2.31         | 1,33.1         |  | 0.14        |      |
| <b>HAD interaction</b>              |              |              |           |              |              |           |              |              |           | <b>9.08</b>  | <b>1,33.1</b>  |  | <b>0.00</b> |      |
| <b>FIS Cognitive onset</b>          | <b>26.36</b> | <b>13.22</b> | <b>72</b> | <b>29.75</b> | <b>15.97</b> | <b>32</b> | <b>24.17</b> | <b>11.63</b> | <b>40</b> | <b>16.72</b> | <b>1,31.06</b> |  | <b>0.00</b> |      |
| <b>FIS cognitive 3m</b>             | <b>42.43</b> | <b>19.04</b> | <b>68</b> | <b>65.24</b> | <b>15.93</b> | <b>32</b> | <b>24.89</b> | <b>12.64</b> | <b>36</b> | <b>17.42</b> | <b>1,31.47</b> |  | <b>0.00</b> |      |
| <b>FIS cognitive interaction</b>    |              |              |           |              |              |           |              |              |           | <b>13.87</b> | <b>1,31.47</b> |  | <b>0.00</b> |      |
| <b>FIS Physical onset</b>           | <b>30.74</b> | <b>13.25</b> | <b>72</b> | <b>35.25</b> | <b>17.84</b> | <b>32</b> | <b>28.02</b> | <b>10.05</b> | <b>40</b> | <b>9.65</b>  | <b>1,33.11</b> |  | <b>0.00</b> |      |
| <b>FIS Physical 3m</b>              | <b>46.86</b> | <b>15.09</b> | <b>68</b> | <b>60.53</b> | <b>8.24</b>  | <b>32</b> | <b>31.36</b> | <b>13.40</b> | <b>36</b> | <b>8.52</b>  | <b>1,33.72</b> |  | <b>0.01</b> |      |
| <b>FIS Physical interaction</b>     |              |              |           |              |              |           |              |              |           | <b>5.28</b>  | <b>1,33.72</b> |  | <b>0.03</b> |      |
| <b>FIS Psychosocial onset</b>       | <b>27.41</b> | <b>9.99</b>  | <b>72</b> | <b>31.06</b> | <b>11.64</b> | <b>32</b> | <b>25.05</b> | <b>9.76</b>  | <b>40</b> | <b>21.81</b> | <b>1,33.85</b> |  | <b>0.00</b> |      |
| <b>FIS Psychosocial 3m</b>          | <b>40.28</b> | <b>16.73</b> | <b>68</b> | <b>58.03</b> | <b>9.66</b>  | <b>32</b> | <b>23.07</b> | <b>12.33</b> | <b>36</b> | <b>13.85</b> | <b>1,33.98</b> |  | <b>0.00</b> |      |
| <b>FIS Psychosocial interaction</b> |              |              |           |              |              |           |              |              |           | <b>22.71</b> | <b>1,33.98</b> |  | <b>0.00</b> |      |

*Note:*

The columns represent count data for Chi-square statistics ( $X^2$ ), Median/IQR for Wilcoxon signed-rank tests (Ws), trimmed mean $\pm$ SD for robust ANOVAs (F), mean $\pm$ SD for independent-samples t-tests and there associated statistical tests and effect sizes. The lines in bold refer to the significant results; Df=Degrees of Freedom; ES=Effect Size; IQR=Inter Quartile Range; N=Sample size; OR=Odds Ratio; SD=Standard Deviation; Stat=Test Statistic; TMean=20% Trimmed Mean; z=Z-value (Wilcoxon test); [B]=statistics for main effect of Between-subject factor 'Group'; [W]=statistics for main effect of Within-subject factor 'Time'; [I]=statistics for Interaction effect ('Group' x 'Time')

<sup>a</sup> Unknown with incomplete evaluation

<sup>b</sup> Unknown despite complete evaluation

<sup>c</sup> Small vessel disease

<sup>d</sup> Patent Foramen Ovale

<sup>e</sup> Cardiac embolism

<sup>f</sup> Cervical artery dissection

<sup>g</sup> Large artery atherosclerosis

<sup>h</sup> More than one possible etiology

<sup>i</sup> Other determined etiology

## 5 REGRESSION MODELS

### 5.1 Binomial Logistic Regression Model - RTpW3m\_Percent (Yes/No)

The assumptions of i) linearity of the logit regarding the continuous independent variables, ii) independent errors and iii) homoscedasticity were verified respectively, i) by running the analysis with only the interact term between each predictor and its log transform (see Field 51), and by relying on the ii) Durbin-Watson statistic 52,53 and iii) the tolerance and VIF statistics (i.e. entire predictors, i.e. all participants' data for one variable, were rejected if their VIF > 10 or Tolerance < 0.1; see Field, 2009, p.242).

Table S32: Coefficients

|                         | Estimate | Std. Error | z value | Pr(> z ) | 2.5 %  | 97.5 % |
|-------------------------|----------|------------|---------|----------|--------|--------|
| (Intercept)             | 1.827    | 0.835      | 2.187   | 0.029    | 0.321  | 3.660  |
| Hyperlipidemia_onsetYes | -1.329   | 0.655      | -2.030  | 0.042    | -2.730 | -0.117 |
| NIHSS_onset             | -0.684   | 0.248      | -2.760  | 0.006    | -1.204 | -0.223 |
| HAD_TOTAL_onset         | 0.001    | 0.041      | 0.032   | 0.974    | -0.079 | 0.085  |

<sup>1</sup> AIC = 93.674

<sup>2</sup> Null deviance = 98.922

<sup>3</sup> Residual deviance = 85.674

Table S33: Deviance residuals

|                      | Df | Deviance | Resid. Df | Resid. Dev | Pr(>Chi) |
|----------------------|----|----------|-----------|------------|----------|
| NULL                 |    |          | 71        | 98.922     |          |
| Hyperlipidemia_onset | 1  | 4.419    | 70        | 94.504     | 0.036    |
| NIHSS_onset          | 1  | 8.829    | 69        | 85.675     | 0.003    |
| HAD_TOTAL_onset      | 1  | 0.001    | 68        | 85.674     | 0.974    |

*Note:*

The difference between the null deviance and the residual deviance shows how our model is doing against the null model (a model with only the intercept). The wider this gap, the better. Analyzing the table we can see the drop in deviance when adding each variable one at a time. Ultimately what you would like to see is a significant drop in deviance and the AIC.

Table S34: Model Fit Measures

| Model | Deviance | AIC    | X2     | df | p     |
|-------|----------|--------|--------|----|-------|
| 1     | 85.674   | 93.674 | 13.248 | 3  | 0.004 |

Table S35: Pseudo  $R^2$  for logistic regression

|                             | R2    |
|-----------------------------|-------|
| Hosmer and Lemeshow $R^2$ : | 0.134 |
| Cox and Snell $R^2$ :       | 0.168 |
| Nagelkerke $R^2$ :          | 0.225 |

Table S36: Odds Ratio

|                         | Odds  | 2.5 % | 97.5 % |
|-------------------------|-------|-------|--------|
| (Intercept)             | 6.218 | 1.209 | 31.975 |
| Hyperlipidemia_onsetYes | 0.265 | 0.073 | 0.955  |
| NIHSS_onset             | 0.505 | 0.310 | 0.820  |
| HAD_TOTAL_onset         | 1.001 | 0.923 | 1.086  |

Table S37: Residuals statistics

|    | standardized.residuals | studentized.residuals | cooks.distance | mahalanobis.distance | dfbeta_Intercept. | dfbeta.Hyperlipidemia_onsetYes | dfbeta.NIHSS_onset | dfbeta.HAD_TOTAL_onset | dfbet  | leverage | covariance.ratios | fitted.values |
|----|------------------------|-----------------------|----------------|----------------------|-------------------|--------------------------------|--------------------|------------------------|--------|----------|-------------------|---------------|
| 1  | -1.121                 | -1.115                | 0.007          | 1.836                | -0.054            | -0.036                         | -0.009             | 0.005                  | -0.184 | 0.033    | 1.034             | 0.455         |
| 3  | -0.472                 | -0.464                | 0.002          | 1.109                | -0.056            | -0.032                         | -0.028             | -0.002                 | -0.115 | 0.070    | 1.129             | 0.098         |
| 4  | -1.422                 | -1.418                | 0.013          | 2.664                | -0.068            | -0.038                         | 0.032              | 0.002                  | -0.224 | 0.030    | 0.994             | 0.625         |
| 5  | 1.004                  | 0.993                 | 0.010          | 1.607                | 0.127             | 0.007                          | -0.021             | -0.007                 | 0.224  | 0.059    | 1.076             | 0.622         |
| 6  | -1.124                 | -1.119                | 0.007          | 1.846                | 0.061             | -0.067                         | -0.007             | -0.004                 | -0.174 | 0.029    | 1.030             | 0.458         |
| 7  | -1.232                 | -1.192                | 0.067          | 1.829                | 0.096             | 0.119                          | -0.069             | -0.016                 | -0.558 | 0.205    | 1.242             | 0.453         |
| 9  | -1.118                 | -1.114                | 0.006          | 1.839                | -0.028            | -0.043                         | -0.009             | 0.003                  | -0.163 | 0.026    | 1.027             | 0.456         |
| 10 | 1.354                  | 1.333                 | 0.052          | 2.222                | 0.061             | -0.168                         | 0.076              | 0.005                  | 0.466  | 0.129    | 1.117             | 0.450         |
| 14 | -0.861                 | -0.852                | 0.006          | 1.421                | -0.019            | -0.034                         | -0.032             | 0.004                  | -0.178 | 0.052    | 1.081             | 0.296         |
| 15 | -0.862                 | -0.855                | 0.005          | 1.427                | 0.071             | -0.058                         | -0.030             | -0.003                 | -0.161 | 0.043    | 1.070             | 0.299         |
| 16 | -1.166                 | -1.142                | 0.034          | 1.811                | -0.150            | 0.170                          | -0.068             | 0.003                  | -0.396 | 0.127    | 1.139             | 0.448         |
| 17 | 0.761                  | 0.751                 | 0.005          | 1.314                | 0.120             | -0.108                         | -0.005             | -0.001                 | 0.166  | 0.057    | 1.095             | 0.761         |
| 18 | 0.988                  | 0.982                 | 0.006          | 1.602                | 0.069             | 0.021                          | -0.022             | -0.003                 | 0.166  | 0.034    | 1.050             | 0.624         |
| 19 | -0.870                 | -0.857                | 0.009          | 1.419                | -0.057            | -0.025                         | -0.033             | 0.007                  | -0.220 | 0.075    | 1.107             | 0.295         |
| 20 | 0.773                  | 0.760                 | 0.007          | 1.317                | 0.178             | -0.125                         | -0.004             | -0.005                 | 0.201  | 0.079    | 1.120             | 0.760         |
| 21 | -2.046                 | -2.074                | 0.083          | 7.336                | -0.276            | 0.243                          | 0.055              | -0.001                 | -0.414 | 0.047    | 0.912             | 0.864         |
| 22 | 1.279                  | 1.271                 | 0.016          | 2.175                | -0.129            | 0.093                          | 0.006              | 0.009                  | 0.261  | 0.050    | 1.034             | 0.460         |
| 23 | -0.858                 | -0.851                | 0.004          | 1.425                | 0.035             | -0.048                         | -0.030             | 0.000                  | -0.151 | 0.038    | 1.065             | 0.298         |
| 24 | 1.283                  | 1.277                 | 0.014          | 2.199                | 0.091             | 0.034                          | 0.012              | -0.008                 | 0.243  | 0.043    | 1.026             | 0.455         |
| 25 | 0.985                  | 0.979                 | 0.006          | 1.596                | -0.019            | 0.044                          | -0.024             | 0.004                  | 0.170  | 0.036    | 1.052             | 0.627         |
| 26 | -0.859                 | -0.851                | 0.005          | 1.423                | -0.001            | -0.039                         | -0.031             | 0.003                  | -0.164 | 0.044    | 1.072             | 0.297         |
| 27 | 0.563                  | 0.555                 | 0.003          | 1.160                | 0.122             | -0.080                         | -0.014             | -0.003                 | 0.131  | 0.065    | 1.118             | 0.862         |
| 28 | 0.777                  | 0.758                 | 0.011          | 1.307                | 0.008             | -0.082                         | -0.008             | 0.008                  | 0.245  | 0.112    | 1.161             | 0.765         |
| 29 | -1.427                 | -1.423                | 0.015          | 2.675                | 0.011             | -0.059                         | 0.034              | -0.004                 | -0.237 | 0.033    | 0.997             | 0.626         |
| 31 | 0.579                  | 0.559                 | 0.008          | 1.153                | -0.024            | -0.044                         | -0.019             | 0.008                  | 0.214  | 0.149    | 1.227             | 0.867         |
| 33 | 0.557                  | 0.551                 | 0.002          | 1.159                | 0.098             | -0.072                         | -0.015             | -0.001                 | 0.115  | 0.051    | 1.102             | 0.863         |
| 35 | -1.453                 | -1.447                | 0.031          | 2.689                | 0.109             | -0.087                         | -0.039             | -0.012                 | -0.339 | 0.063    | 1.025             | 0.628         |
| 36 | 0.557                  | 0.550                 | 0.002          | 1.159                | 0.093             | -0.071                         | -0.015             | -0.001                 | 0.113  | 0.050    | 1.100             | 0.863         |
| 37 | 0.991                  | 0.982                 | 0.008          | 1.594                | -0.052            | 0.053                          | -0.025             | 0.006                  | 0.203  | 0.050    | 1.067             | 0.627         |
| 38 | 1.586                  | 1.585                 | 0.024          | 3.354                | -0.064            | 0.090                          | 0.056              | 0.000                  | 0.281  | 0.038    | 0.979             | 0.298         |
| 39 | -0.477                 | -0.467                | 0.003          | 1.110                | 0.074             | -0.037                         | -0.029             | -0.003                 | -0.127 | 0.083    | 1.145             | 0.999         |
| 40 | 0.985                  | 0.979                 | 0.006          | 1.596                | -0.019            | 0.044                          | -0.024             | 0.004                  | 0.170  | 0.036    | 1.052             | 0.627         |
| 41 | -1.423                 | -1.420                | 0.013          | 2.671                | -0.020            | -0.051                         | 0.034              | -0.002                 | -0.223 | 0.030    | 0.994             | 0.626         |
| 42 | 0.565                  | 0.556                 | 0.003          | 1.160                | 0.127             | -0.081                         | -0.014             | -0.004                 | 0.136  | 0.069    | 1.123             | 0.862         |
| 43 | 0.993                  | 0.983                 | 0.009          | 1.593                | -0.063            | 0.057                          | -0.026             | 0.007                  | 0.216  | 0.056    | 1.074             | 0.628         |
| 45 | 1.586                  | 1.585                 | 0.024          | 3.354                | -0.064            | 0.090                          | 0.056              | 0.000                  | 0.281  | 0.038    | 0.979             | 0.298         |
| 47 | 0.984                  | 0.979                 | 0.005          | 1.600                | 0.036             | 0.029                          | -0.023             | -0.001                 | 0.152  | 0.029    | 1.044             | 0.625         |
| 49 | -2.067                 | -2.110                | 0.133          | 7.235                | -0.484            | 0.303                          | 0.052              | 0.014                  | -0.527 | 0.073    | 0.933             | 0.862         |
| 50 | 0.996                  | 0.988                 | 0.008          | 1.605                | 0.103             | 0.012                          | -0.022             | -0.006                 | 0.197  | 0.047    | 1.063             | 0.623         |
| 51 | 0.984                  | 0.978                 | 0.005          | 1.597                | -0.008            | 0.041                          | -0.024             | 0.003                  | 0.163  | 0.033    | 1.049             | 0.626         |
| 52 | -0.643                 | -0.635                | 0.004          | 1.215                | 0.057             | -0.042                         | -0.034             | -0.001                 | -0.142 | 0.058    | 1.105             | 0.177         |
| 53 | 0.983                  | 0.978                 | 0.005          | 1.599                | 0.025             | 0.032                          | -0.023             | 0.000                  | 0.151  | 0.029    | 1.044             | 0.625         |
| 54 | -1.138                 | -1.130                | 0.012          | 1.851                | 0.115             | -0.082                         | -0.006             | -0.008                 | -0.232 | 0.050    | 1.050             | 0.460         |
| 55 | 0.993                  | 0.983                 | 0.009          | 1.593                | -0.063            | 0.057                          | -0.026             | 0.007                  | 0.216  | 0.056    | 1.074             | 0.628         |
| 56 | -0.650                 | -0.639                | 0.004          | 1.217                | 0.087             | -0.051                         | -0.034             | -0.003                 | -0.159 | 0.071    | 1.120             | 0.178         |
| 57 | 0.983                  | 0.978                 | 0.005          | 1.598                | 0.003             | 0.038                          | -0.023             | 0.002                  | 0.157  | 0.031    | 1.046             | 0.626         |
| 58 | 0.991                  | 0.984                 | 0.006          | 1.603                | 0.080             | 0.018                          | -0.022             | -0.004                 | 0.175  | 0.038    | 1.053             | 0.624         |
| 59 | 0.984                  | 0.979                 | 0.005          | 1.600                | 0.036             | 0.029                          | -0.023             | -0.001                 | 0.152  | 0.029    | 1.044             | 0.625         |
| 60 | 1.591                  | 1.590                 | 0.027          | 3.363                | -0.015            | 0.077                          | -0.057             | -0.004                 | 0.297  | 0.041    | 0.982             | 0.297         |
| 62 | 0.760                  | 0.750                 | 0.005          | 1.313                | 0.105             | -0.104                         | -0.005             | 0.000                  | 0.165  | 0.056    | 1.095             | 0.762         |
| 63 | -1.422                 | -1.419                | 0.013          | 2.669                | -0.036            | -0.047                         | 0.033              | 0.000                  | -0.220 | 0.029    | 0.993             | 0.625         |
| 64 | -1.423                 | -1.420                | 0.015          | 2.660                | -0.099            | -0.030                         | 0.032              | 0.004                  | -0.241 | 0.034    | 0.999             | 0.624         |
| 65 | 0.759                  | 0.750                 | 0.005          | 1.312                | 0.090             | -0.100                         | -0.005             | 0.001                  | 0.168  | 0.058    | 1.097             | 0.762         |
| 66 | -0.863                 | -0.853                | 0.007          | 1.421                | -0.028            | -0.032                         | -0.032             | 0.005                  | -0.187 | 0.056    | 1.086             | 0.296         |
| 68 | 1.270                  | 1.266                 | 0.008          | 2.192                | 0.032             | 0.049                          | 0.010              | -0.003                 | 0.186  | 0.026    | 1.010             | 0.456         |
| 69 | -1.453                 | -1.447                | 0.031          | 2.689                | 0.109             | -0.087                         | 0.038              | -0.012                 | -0.339 | 0.063    | 1.025             | 0.628         |
| 70 | 0.557                  | 0.551                 | 0.002          | 1.159                | 0.098             | -0.072                         | -0.015             | -0.001                 | 0.115  | 0.051    | 1.102             | 0.863         |
| 71 | -0.641                 | -0.633                | 0.004          | 1.214                | 0.028             | -0.034                         | -0.035             | 0.001                  | -0.142 | 0.058    | 1.105             | 0.176         |
| 72 | 0.561                  | 0.550                 | 0.004          | 1.155                | 0.018             | -0.052                         | -0.017             | 0.005                  | 0.151  | 0.085    | 1.142             | 0.866         |
| 73 | 1.268                  | 1.264                 | 0.008          | 2.191                | 0.017             | 0.052                          | 0.010              | -0.002                 | 0.178  | 0.024    | 1.008             | 0.456         |
| 74 | 0.786                  | 0.768                 | 0.010          | 1.318                | 0.216             | -0.138                         | -0.003             | -0.008                 | 0.240  | 0.106    | 1.152             | 0.759         |
| 75 | 1.360                  | 1.339                 | 0.053          | 2.235                | 0.192             | -0.203                         | 0.079              | -0.005                 | 0.469  | 0.130    | 1.117             | 0.447         |
| 76 | -1.422                 | -1.418                | 0.013          | 2.664                | -0.068            | -0.038                         | 0.032              | 0.002                  | -0.224 | 0.030    | 0.994             | 0.625         |
| 77 | -2.052                 | -2.087                | 0.103          | 7.268                | -0.410            | 0.281                          | 0.053              | 0.009                  | -0.462 | 0.058    | 0.921             | 0.862         |
| 80 | -0.859                 | -0.851                | 0.005          | 1.423                | -0.001            | -0.039                         | -0.031             | 0.003                  | -0.164 | 0.044    | 1.072             | 0.297         |
| 81 | 0.986                  | 0.981                 | 0.005          | 1.602                | 0.058             | 0.024                          | -0.022             | -0.002                 | 0.159  | 0.032    | 1.047             | 0.624         |
| 85 | 0.988                  | 0.980                 | 0.007          | 1.594                | -0.041            | 0.050                          | -0.025             | 0.005                  | 0.190  | 0.045    | 1.061             | 0.627         |
| 91 | 1.000                  | 0.990                 | 0.009          | 1.606                | 0.115             | -0.009                         | -0.022             | -0.007                 | 0.210  | 0.053    | 1.069             | 0.623         |
| 92 | 1.272                  | 1.268                 | 0.009          | 2.194                | 0.046             | 0.045                          | 0.010              | -0.004                 | 0.197  | 0.029    | 1.013             | 0.456         |
| 93 | -1.430                 | -1.426                | 0.016          | 2.678                | 0.027             | -0.064                         | 0.035              | -0.005                 | -0.249 | 0.036    | 1.000             | 0.627         |
| 94 | -0.858                 | -0.851                | 0.005          | 1.423                | 0.008             | -0.041                         | -0.031             | 0.002                  | -0.158 | 0.041    | 1.069             | 0.297         |
| 95 | -1.425                 | -1.421                | 0.017          | 2.658                | -0.116            | -0.026                         | 0.032              | 0.006                  | -0.253 | 0.038    | 1.002             | 0.624         |

Table S38: Assumption of linearity of the logit (for continuous predictors)

|                             | Estimate | Std. Error | z value | Pr(> z ) |
|-----------------------------|----------|------------|---------|----------|
| (Intercept)                 | -26.230  | 3827.021   | -0.007  | 0.995    |
| Hyperlipidemia_onsetYes     | -19.672  | 2320.244   | -0.008  | 0.993    |
| NIHSS_onset                 | 43.557   | 6147.260   | 0.007   | 0.994    |
| HAD_TOTAL_onset             | 1.010    | 1.071      | 0.943   | 0.346    |
| LogNIHSS_onsetInt           | -32.331  | 4434.310   | -0.007  | 0.994    |
| LogHAD_TOTAL_onset_onsetInt | -0.308   | 0.313      | -0.982  | 0.326    |

Table S39: Durbin-Watson test (Assumption of independence)

| Autocorrelation | DWStatistic | p    |
|-----------------|-------------|------|
| -0.087          | 2.138       | 0.57 |

*Note:*

<1 or >3 is cause for concern. If close to 2 = assumption met

Table S40: Colinearity Diagnostics

|                      | VIF   | Tolerance |
|----------------------|-------|-----------|
| Hyperlipidemia_onset | 1.088 | 0.919     |
| NIHSS_onset          | 1.038 | 0.964     |
| HAD_TOTAL_onset      | 1.060 | 0.943     |

Table S41: Classification Table

|        | False | True | % Change |
|--------|-------|------|----------|
| NoRTpW | 19    | 13   | 59.375   |
| RTpW   | 10    | 30   | 75.000   |

Table S42: Predictive Measures

| Accuracy | Specificity | Sensitivity | AUC   | Cutoff |
|----------|-------------|-------------|-------|--------|
| 0.681    | 0.594       | 0.75        | 0.729 | 0.5    |

Figure S27: ROC Curve

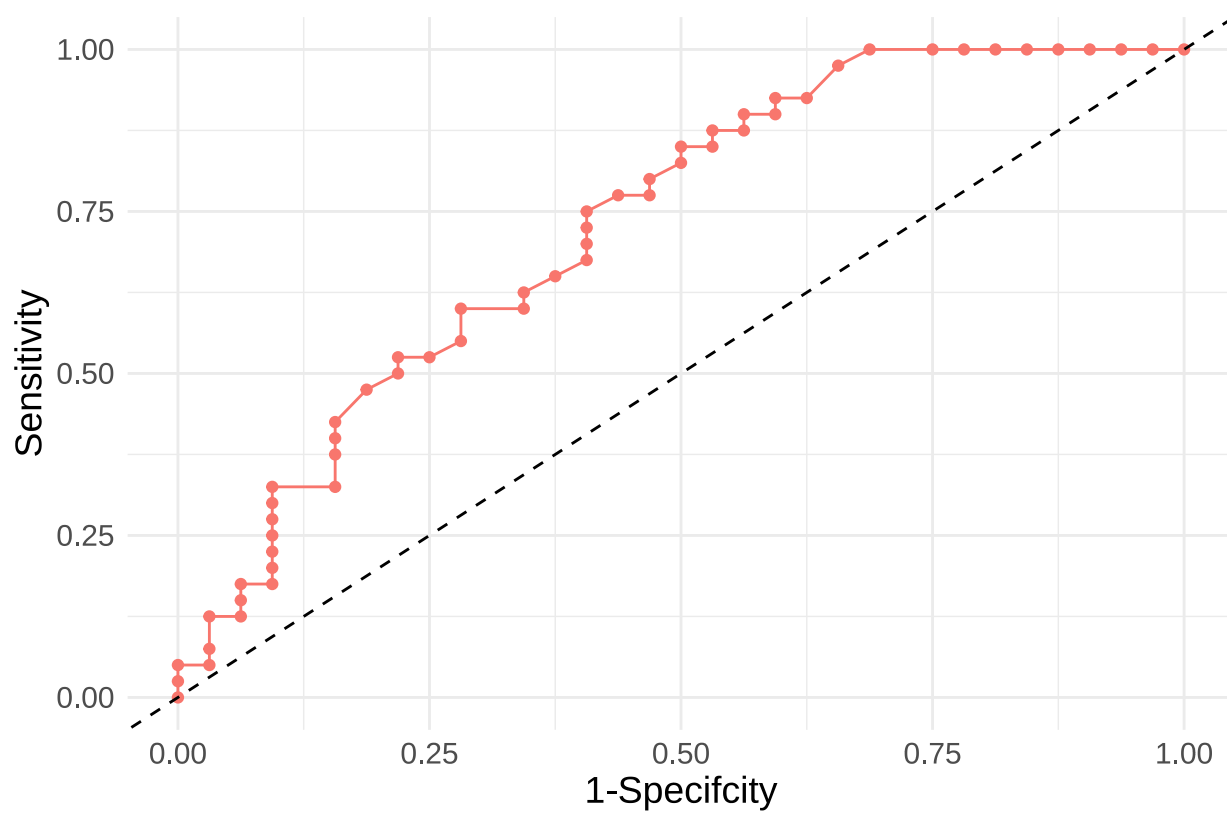

Note: ROC Curve for the binary logistic regression model

## 5.2 Negative Binomial Regression Model - RTpWMonths

Since the distribution of our dependent variable was right-skewed (see Figure 2), we computed a negative binomial regression model with log link function (Beaujean and Grant, 2016).

To verify the model's assumptions, we i) ran a likelihood ratio test contrasting our negative binomial regression model against a Poisson regression model (i.e.  $p < .001$  favoring the former) and further ii) interpreted the dispersion parameter of the distribution  $\theta$  ( ) in the range between 0 and 4.

Table S43: Mean and SD for the RTpWMonths DV

| Mean  | SD    |
|-------|-------|
| 1.986 | 2.447 |

Table S44: Coefficients

|                          | Estimate | Std. Error | z value | Pr(> z ) | 2.5 %  | 97.5 % |
|--------------------------|----------|------------|---------|----------|--------|--------|
| (Intercept)              | -0.461   | 0.454      | -1.016  | 0.310    | -1.429 | 0.462  |
| Hyperlipidemia__onsetYes | 0.737    | 0.353      | 2.091   | 0.037    | 0.022  | 1.477  |
| NIHSS__onset             | 0.220    | 0.120      | 1.831   | 0.067    | -0.025 | 0.476  |
| HAD__TOTAL__onset        | 0.040    | 0.021      | 1.950   | 0.051    | 0.001  | 0.080  |

<sup>1</sup> AIC = 235.003

<sup>2</sup> Null deviance: = 73.173

<sup>3</sup> Residual deviance: = 64.655

<sup>4</sup> Theta: = 1.470

<sup>5</sup> Theta SEr: = 0.515

<sup>6</sup> 2x log-likelihood: = -225.003

Table S45: Pseudo  $R^2$  values

|                              | R2    |
|------------------------------|-------|
| McFadden                     | 0.201 |
| Cox and Snell (ML)           | 0.617 |
| Nagelkerke (Cragg and Uhler) | 0.623 |

Table S46: Omnibus test

| Model                                                    | theta | Resid. df | 2 x log-lik. | Test   | df | LR stat. | Pr(Chi) |
|----------------------------------------------------------|-------|-----------|--------------|--------|----|----------|---------|
| 1                                                        | 1.096 | 73        | -281.699     |        |    |          |         |
| Hyperlipidemia__onset + NIHSS__onset + HAD__TOTAL__onset | 1.470 | 55        | -225.003     | 1 vs 2 | 18 | 56.696   | 0       |

Table S47: Incidence rate ratios

|                         | exp(Est.) | 2.5%  | 97.5% | z val. | p     |
|-------------------------|-----------|-------|-------|--------|-------|
| (Intercept)             | 0.631     | 0.259 | 1.534 | -1.016 | 0.310 |
| Hyperlipidemia_onsetYes | 2.090     | 1.047 | 4.170 | 2.091  | 0.037 |
| NIHSS_onset             | 1.246     | 0.985 | 1.577 | 1.831  | 0.067 |
| HAD_TOTAL_onset         | 1.041     | 1.000 | 1.084 | 1.950  | 0.051 |

Table S48: MODEL ASSUMPTION: Likelihood ratio test Negative Binomial Reg &gt; Poisson Reg models

| Pvalue |
|--------|
| 0      |

Table S49: Residuals statistics

|    | standardized.residuals | studentized.residuals | cooks.distance | mahalanobis.distance | dfbeta_Intercept. | dfbeta.Hyperlipidemia_onsetYes | dfbeta.NIHSS_onset | dfbeta.HAD_TOTAL_onset | dfbet  | leverage | covariance.ratios | fitted.values |
|----|------------------------|-----------------------|----------------|----------------------|-------------------|--------------------------------|--------------------|------------------------|--------|----------|-------------------|---------------|
| 1  | 0.414                  | 0.380                 | 0.002          | 0.495                | 0.013             | 0.006                          | 0.001              | -0.001                 | 0.069  | 0.032    | 1.100             | 2.007         |
| 3  | -1.129                 | -0.991                | 0.048          | 0.682                | 0.130             | -0.075                         | -0.061             | -0.004                 | -0.546 | 0.215    | 1.266             | 6.282         |
| 5  | 0.359                  | 0.330                 | 0.002          | 0.458                | 0.023             | 0.001                          | -0.004             | -0.001                 | 0.076  | 0.051    | 1.125             | 1.372         |
| 7  | 1.564                  | 1.598                 | 0.307          | 1.934                | -0.045            | -0.086                         | 0.045              | 0.009                  | 0.727  | 0.199    | 1.152             | 3.749         |
| 10 | -0.222                 | -0.202                | 0.002          | 0.203                | -0.009            | 0.016                          | -0.006             | 0.000                  | -0.076 | 0.122    | 1.222             | 2.511         |
| 14 | 0.563                  | 0.521                 | 0.006          | 0.665                | 0.013             | 0.009                          | 0.009              | -0.001                 | 0.126  | 0.056    | 1.118             | 2.403         |
| 16 | 0.052                  | 0.048                 | 0.000          | 0.054                | 0.004             | -0.004                         | 0.001              | 0.000                  | 0.017  | 0.118    | 1.219             | 1.897         |
| 17 | -1.397                 | -1.271                | 0.012          | 1.000                | -0.133            | 0.111                          | 0.003              | 0.002                  | -0.331 | 0.061    | 1.014             | 1.271         |
| 18 | -1.523                 | -1.401                | 0.007          | 1.000                | -0.057            | -0.019                         | 0.017              | 0.002                  | -0.271 | 0.035    | 0.964             | 1.676         |
| 19 | 1.063                  | 1.006                 | 0.040          | 1.443                | 0.051             | 0.007                          | 0.017              | -0.004                 | 0.282  | 0.077    | 1.086             | 2.047         |
| 20 | 0.032                  | 0.030                 | 0.000          | 0.041                | 0.004             | -0.003                         | 0.000              | 0.000                  | 0.009  | 0.077    | 1.166             | 0.960         |
| 22 | -0.487                 | -0.443                | 0.003          | 0.408                | 0.027             | -0.023                         | 0.000              | -0.002                 | -0.106 | 0.054    | 1.121             | 3.379         |
| 24 | -1.580                 | -1.453                | 0.009          | 1.000                | -0.066            | -0.015                         | -0.003             | 0.004                  | -0.299 | 0.040    | 0.957             | 1.852         |
| 25 | -0.668                 | -0.608                | 0.003          | 0.567                | 0.007             | -0.021                         | 0.009              | -0.001                 | -0.126 | 0.041    | 1.091             | 2.310         |
| 26 | -1.775                 | -1.635                | 0.013          | 1.000                | -0.018            | -0.036                         | -0.029             | 0.003                  | -0.377 | 0.049    | 0.927             | 2.603         |
| 27 | -1.141                 | -1.029                | 0.011          | 1.000                | -0.150            | 0.096                          | 0.013              | 0.004                  | -0.308 | 0.079    | 1.077             | 0.740         |
| 28 | -0.145                 | -0.132                | 0.001          | 0.138                | -0.002            | 0.008                          | 0.001              | -0.001                 | -0.050 | 0.123    | 1.226             | 2.319         |
| 31 | -0.307                 | -0.276                | 0.007          | 0.251                | 0.011             | 0.014                          | 0.007              | -0.003                 | -0.169 | 0.266    | 1.458             | 2.669         |
| 33 | -1.230                 | -1.114                | 0.011          | 1.000                | -0.140            | 0.099                          | 0.016              | 0.003                  | -0.308 | 0.068    | 1.051             | 0.905         |
| 36 | -1.249                 | -1.132                | 0.011          | 1.000                | -0.137            | 0.099                          | 0.016              | 0.002                  | -0.310 | 0.067    | 1.046             | 0.942         |
| 37 | -0.769                 | -0.699                | 0.006          | 0.616                | 0.024             | -0.030                         | 0.011              | -0.002                 | -0.172 | 0.056    | 1.099             | 2.605         |
| 38 | -0.383                 | -0.358                | 0.001          | 0.346                | 0.006             | -0.012                         | -0.006             | 0.000                  | -0.077 | 0.044    | 1.115             | 3.056         |
| 40 | 0.269                  | 0.247                 | 0.001          | 0.299                | -0.003            | 0.008                          | -0.003             | 0.000                  | 0.051  | 0.041    | 1.117             | 2.310         |
| 41 | 1.550                  | 1.471                 | 0.045          | 2.418                | 0.012             | 0.037                          | -0.019             | 0.001                  | 0.268  | 0.033    | 0.957             | 2.048         |
| 42 | -1.124                 | -1.012                | 0.012          | 1.000                | -0.151            | 0.096                          | 0.013              | 0.004                  | -0.309 | 0.082    | 1.083             | 0.711         |
| 43 | -0.287                 | -0.261                | 0.001          | 0.262                | 0.011             | -0.012                         | 0.004              | -0.001                 | -0.068 | 0.063    | 1.142             | 2.711         |
| 45 | -0.890                 | -0.811                | 0.005          | 0.673                | 0.015             | -0.027                         | -0.014             | 0.000                  | -0.175 | 0.044    | 1.071             | 3.056         |
| 47 | -1.585                 | -1.462                | 0.007          | 1.000                | -0.032            | -0.030                         | 0.019              | 0.001                  | -0.269 | 0.032    | 0.949             | 1.890         |
| 50 | -1.465                 | -1.343                | 0.009          | 1.000                | -0.079            | -0.008                         | 0.016              | 0.004                  | -0.290 | 0.043    | 0.983             | 1.486         |
| 51 | 0.648                  | 0.599                 | 0.006          | 0.803                | -0.003            | 0.019                          | -0.008             | 0.001                  | 0.117  | 0.037    | 1.089             | 2.219         |
| 52 | -1.190                 | -1.072                | 0.020          | 0.767                | 0.068             | -0.054                         | -0.039             | -0.001                 | -0.369 | 0.101    | 1.096             | 4.295         |
| 53 | -0.537                 | -0.490                | 0.002          | 0.492                | -0.008            | -0.012                         | 0.007              | 0.000                  | -0.090 | 0.032    | 1.092             | 1.968         |
| 54 | 1.084                  | 1.019                 | 0.029          | 1.368                | -0.060            | 0.051                          | 0.001              | 0.004                  | 0.239  | 0.054    | 1.057             | 3.379         |
| 55 | -1.811                 | -1.661                | 0.017          | 1.000                | 0.068             | -0.077                         | 0.025              | -0.006                 | -0.440 | 0.063    | 0.932             | 2.711         |
| 56 | -0.295                 | -0.267                | 0.003          | 0.238                | 0.029             | -0.018                         | -0.010             | -0.001                 | -0.104 | 0.130    | 1.230             | 5.247         |
| 57 | -0.602                 | -0.549                | 0.002          | 0.531                | -0.001            | -0.016                         | 0.008              | 0.000                  | -0.105 | 0.035    | 1.090             | 2.132         |
| 58 | -1.503                 | -1.381                | 0.008          | 1.000                | -0.064            | -0.015                         | 0.017              | 0.003                  | -0.276 | 0.037    | 0.970             | 1.610         |
| 59 | -1.585                 | -1.462                | 0.007          | 1.000                | -0.032            | -0.030                         | 0.019              | 0.001                  | -0.269 | 0.032    | 0.949             | 1.890         |
| 60 | 0.104                  | 0.095                 | 0.000          | 0.107                | 0.000             | 0.002                          | 0.002              | 0.000                  | 0.021  | 0.046    | 1.128             | 2.710         |
| 63 | 2.612                  | 2.617                 | 0.189          | 5.098                | 0.037             | 0.056                          | -0.032             | 0.000                  | 0.461  | 0.032    | 0.712             | 1.968         |
| 64 | 1.831                  | 1.702                 | 0.075          | 3.176                | 0.068             | 0.022                          | -0.021             | -0.003                 | 0.328  | 0.035    | 0.901             | 1.676         |
| 65 | 0.739                  | 0.688                 | 0.013          | 1.010                | 0.056             | -0.055                         | -0.002             | 0.000                  | 0.174  | 0.062    | 1.109             | 1.492         |
| 66 | 0.272                  | 0.250                 | 0.001          | 0.300                | 0.008             | 0.004                          | 0.004              | -0.001                 | 0.063  | 0.060    | 1.140             | 2.308         |
| 68 | 0.330                  | 0.302                 | 0.001          | 0.380                | 0.006             | 0.006                          | 0.001              | 0.000                  | 0.050  | 0.027    | 1.099             | 2.174         |
| 69 | 0.385                  | 0.355                 | 0.003          | 0.417                | -0.017            | 0.017                          | -0.005             | 0.002                  | 0.097  | 0.071    | 1.147             | 2.822         |
| 70 | -1.230                 | -1.114                | 0.011          | 1.000                | -0.140            | 0.099                          | 0.016              | 0.003                  | -0.308 | 0.068    | 1.051             | 0.905         |
| 71 | -0.164                 | -0.149                | 0.001          | 0.146                | 0.003             | -0.005                         | -0.005             | 0.000                  | -0.049 | 0.096    | 1.189             | 3.515         |
| 72 | -0.520                 | -0.468                | 0.008          | 0.463                | -0.014            | 0.031                          | 0.009              | -0.002                 | -0.185 | 0.131    | 1.218             | 1.861         |
| 73 | -1.677                 | -1.553                | 0.006          | 1.000                | -0.029            | -0.035                         | -0.003             | 0.001                  | -0.254 | 0.026    | 0.924             | 2.263         |
| 74 | 0.161                  | 0.148                 | 0.001          | 0.222                | 0.023             | -0.015                         | 0.000              | -0.001                 | 0.047  | 0.092    | 1.184             | 0.818         |
| 75 | 0.541                  | 0.504                 | 0.013          | 0.646                | 0.048             | -0.047                         | 0.014              | -0.001                 | 0.182  | 0.120    | 1.200             | 1.822         |
| 76 | -0.474                 | -0.432                | 0.001          | 0.449                | -0.012            | -0.008                         | 0.006              | 0.000                  | -0.079 | 0.032    | 1.097             | 1.816         |
| 77 | 0.879                  | 0.826                 | 0.025          | 1.493                | 0.109             | -0.073                         | -0.011             | -0.003                 | 0.228  | 0.074    | 1.107             | 0.802         |
| 81 | -1.543                 | -1.421                | 0.007          | 1.000                | -0.049            | -0.022                         | 0.018              | 0.002                  | -0.268 | 0.034    | 0.958             | 1.745         |
| 85 | -0.210                 | -0.192                | 0.001          | 0.201                | 0.005             | -0.008                         | 0.003              | -0.001                 | -0.044 | 0.050    | 1.130             | 2.503         |
| 91 | 0.780                  | 0.725                 | 0.011          | 1.101                | 0.046             | 0.003                          | -0.008             | -0.002                 | 0.159  | 0.047    | 1.087             | 1.428         |
| 92 | -1.637                 | -1.513                | 0.007          | 1.000                | -0.040            | -0.026                         | -0.003             | 0.003                  | -0.266 | 0.029    | 0.936             | 2.089         |
| 93 | -1.701                 | -1.569                | 0.010          | 1.000                | 0.018             | -0.053                         | 0.022              | -0.003                 | -0.328 | 0.041    | 0.934             | 2.310         |
| 95 | 0.648                  | 0.599                 | 0.006          | 0.863                | 0.028             | 0.006                          | -0.007             | -0.001                 | 0.117  | 0.037    | 1.089             | 1.610         |

Table S50: Durbin-Watson test (Assumption of independence)

| Autocorrelation | DWStatistic | p     |
|-----------------|-------------|-------|
| 0.253           | 1.485       | 0.044 |

*Note:*

<1 or >3 is cause for concern. If close to 2 = assumption met

Table S51: Colinearity Diagnostics

|                      | VIF   | Tolerance |
|----------------------|-------|-----------|
| Hyperlipidemia_onset | 1.131 | 0.884     |
| NIHSS_onset          | 1.012 | 0.988     |
| HAD_TOTAL_onset      | 1.125 | 0.889     |



Figure S28: Number of months needed to RTpW

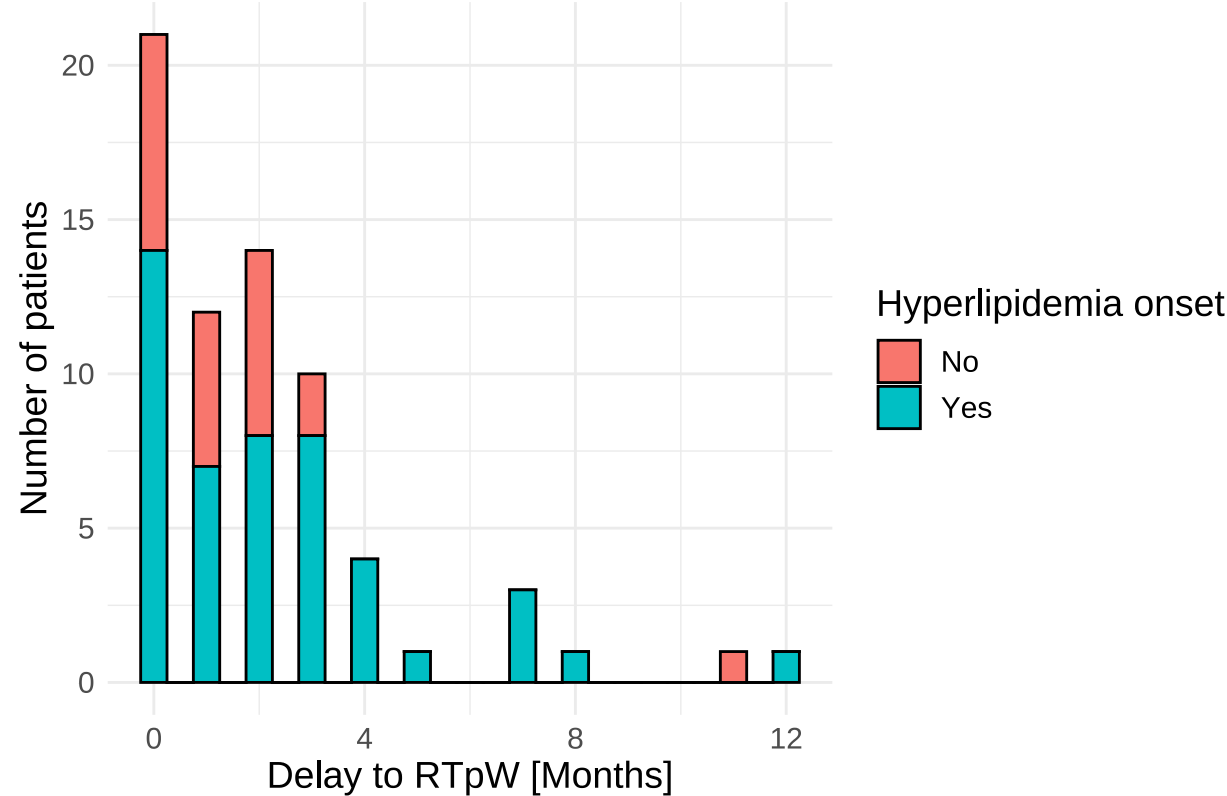

Note: Histogram of the number of months needed to RTpW by Hyperlipidemia

Figure S29: Assumption of heteroscedasticity

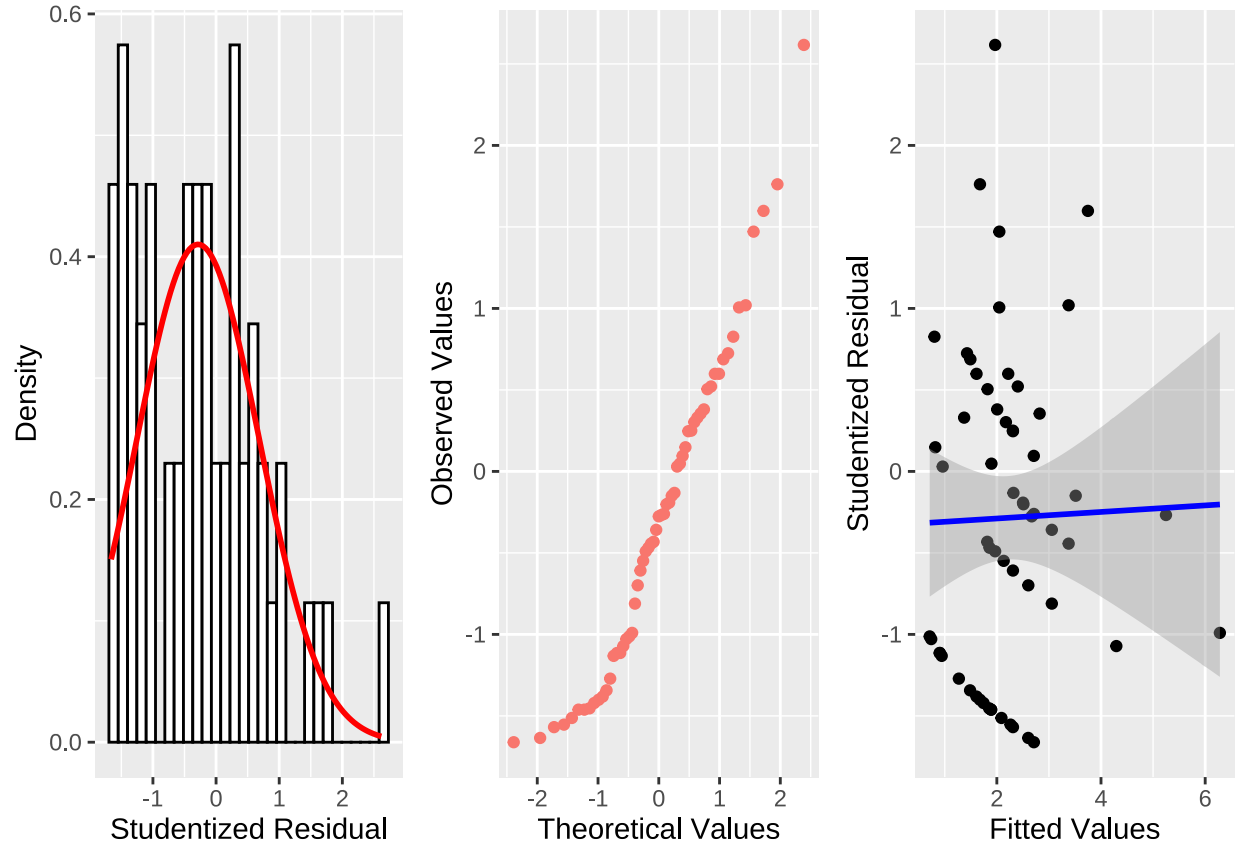

Table S52: Breusch-Pagan test for heteroskedasticity

|    | BP    | Df | p    |
|----|-------|----|------|
| BP | 1.598 | 3  | 0.66 |

Table S53: Predicted probabilities

| Hyperlipidemia_onset | HAD_TOTAL_onset | NIHSS_onset | PredictedRTpWMonths |
|----------------------|-----------------|-------------|---------------------|
| No                   | 10.797          | 0.859       | 1.175               |
| Yes                  | 10.797          | 0.859       | 2.455               |

## 6 CAUSAL MEDIATION MODEL

To further assess whether NIHSS could mediate the predictive effect of hyperlipidemia over the likelihood to RTpW at 3 months (RTpW3m\_Percent (Yes/No)), we ran a mediation analysis using the mediation R package.

To verify the model's assumptions, we ran a sensitivity analysis using the medsens function.

Table S54: Total effect (IV  $\rightarrow$  DV)

|                         | Estimate | Std. Error | z value | Pr(> z ) |
|-------------------------|----------|------------|---------|----------|
| (Intercept)             | 1.099    | 0.516      | 2.127   | 0.033    |
| Hyperlipidemia_onsetYes | -1.176   | 0.586      | -2.005  | 0.045    |

Table S55: Mediator effect (IV  $\rightarrow$  mediator)

|                         | Estimate | Std. Error | t value | Pr(> t ) |
|-------------------------|----------|------------|---------|----------|
| (Intercept)             | 0.900    | 0.258      | 3.483   | 0.001    |
| Hyperlipidemia_onsetYes | 0.023    | 0.304      | 0.076   | 0.940    |

Table S56: Direct effect (IV + mediator  $\rightarrow$  DV)

|                         | Estimate | Std. Error | z value | Pr(> z ) |
|-------------------------|----------|------------|---------|----------|
| (Intercept)             | 1.845    | 0.634      | 2.909   | 0.004    |
| Hyperlipidemia_onsetYes | -1.334   | 0.639      | -2.088  | 0.037    |
| NIHSS_onset             | -0.684   | 0.248      | -2.760  | 0.006    |

Table S57: Mediation analysis

|                          | Estimate | 2.5CI  | 97.5CI | P.value |
|--------------------------|----------|--------|--------|---------|
| ACME (control)           | -0.003   | -0.085 | 0.071  | 0.920   |
| ACME (treated)           | -0.003   | -0.097 | 0.098  | 0.920   |
| ADE (control)            | -0.275   | -0.505 | -0.033 | 0.028   |
| ADE (treated)            | -0.275   | -0.517 | -0.035 | 0.028   |
| Total Effect             | -0.278   | -0.514 | -0.020 | 0.036   |
| Prop. Mediated (control) | 0.010    | -0.774 | 0.478  | 0.916   |
| Prop. Mediated (treated) | 0.012    | -0.784 | 0.490  | 0.916   |
| ACME (average)           | -0.003   | -0.092 | 0.083  | 0.920   |
| ADE (average)            | -0.275   | -0.509 | -0.034 | 0.028   |
| Prop. Mediated (average) | 0.011    | -0.758 | 0.484  | 0.916   |

<sup>1</sup> ACME = Average Causal Mediation Effects, i.e. indirect effect of IV on DV going through the mediator.

<sup>2</sup> ADE = Average Direct Effects, i.e. direct effect of IV on the DV

<sup>3</sup> Total Effect = direct + indirect effects on the DV

<sup>4</sup> Prop. Mediated = proportion of IV effect on the DV going through the mediator, i.e. ACME/total effect

```
## [1] 1
```

```
## [1] "Rho at which ACME for Control Group = 0: -0.800"
```

Table S58: Sensitivity analysis

| Rho  | ACME(C) | 2.5CI(C) | 97.5CI(C) | ACME(T) | 2.5CI(T) | 97.5CI(T) | $R^2_M \cdot R^2_{Y^*}$ | $R^2_M \sim R^2_{Y\sim}$ |
|------|---------|----------|-----------|---------|----------|-----------|-------------------------|--------------------------|
| -0.9 | -0.006  | -0.285   | 0.187     | 0.019   | -0.276   | 0.304     | 0.81                    | 0.599                    |
| -0.8 | 0.000   | -0.164   | 0.123     | 0.012   | -0.170   | 0.189     | 0.64                    | 0.473                    |
| -0.7 | 0.001   | -0.105   | 0.083     | 0.007   | -0.114   | 0.127     | 0.49                    | 0.362                    |
| -0.6 | 0.001   | -0.069   | 0.059     | 0.005   | -0.075   | 0.085     | 0.36                    | 0.266                    |
| -0.5 | 0.001   | -0.043   | 0.038     | 0.003   | -0.050   | 0.052     | 0.25                    | 0.185                    |
| -0.4 | 0.000   | -0.023   | 0.022     | 0.001   | -0.027   | 0.033     | 0.16                    | 0.118                    |
| -0.3 | 0.000   | -0.015   | 0.017     | -0.001  | -0.023   | 0.022     | 0.09                    | 0.067                    |
| -0.2 | -0.001  | -0.025   | 0.026     | -0.002  | -0.040   | 0.031     | 0.04                    | 0.030                    |
| -0.1 | -0.002  | -0.040   | 0.038     | -0.003  | -0.056   | 0.049     | 0.01                    | 0.007                    |
| 0.0  | -0.003  | -0.054   | 0.050     | -0.004  | -0.073   | 0.065     | 0.00                    | 0.000                    |
| 0.1  | -0.004  | -0.068   | 0.062     | -0.005  | -0.094   | 0.082     | 0.01                    | 0.007                    |
| 0.2  | -0.005  | -0.083   | 0.076     | -0.007  | -0.115   | 0.099     | 0.04                    | 0.030                    |
| 0.3  | -0.007  | -0.100   | 0.091     | -0.008  | -0.135   | 0.119     | 0.09                    | 0.067                    |
| 0.4  | -0.008  | -0.123   | 0.106     | -0.009  | -0.155   | 0.139     | 0.16                    | 0.118                    |
| 0.5  | -0.011  | -0.150   | 0.120     | -0.011  | -0.186   | 0.161     | 0.25                    | 0.185                    |
| 0.6  | -0.014  | -0.179   | 0.138     | -0.012  | -0.216   | 0.190     | 0.36                    | 0.266                    |
| 0.7  | -0.018  | -0.226   | 0.162     | -0.015  | -0.255   | 0.226     | 0.49                    | 0.362                    |
| 0.8  | -0.026  | -0.297   | 0.191     | -0.018  | -0.310   | 0.277     | 0.64                    | 0.473                    |
| 0.9  | -0.044  | -0.445   | 0.244     | -0.023  | -0.394   | 0.365     | 0.81                    | 0.599                    |

Note:

C = Control condition; T = Treatment condition

```
## [1] "R^2_M * R^2_Y* at which ACME for Control Group = 0: 0.640"
## [1] "R^2_M ~ R^2_Y~ at which ACME for Control Group = 0: 0.473"
## [1] "Rho at which ACME for Treatment Group = 0: -0.300"
## [1] "R^2_M * R^2_Y* at which ACME for Treatment Group = 0: 0.090"
## [1] "R^2_M ~ R^2_Y~ at which ACME for Treatment Group = 0: 0.067"
```

Figure S30: Sensitivity analysis

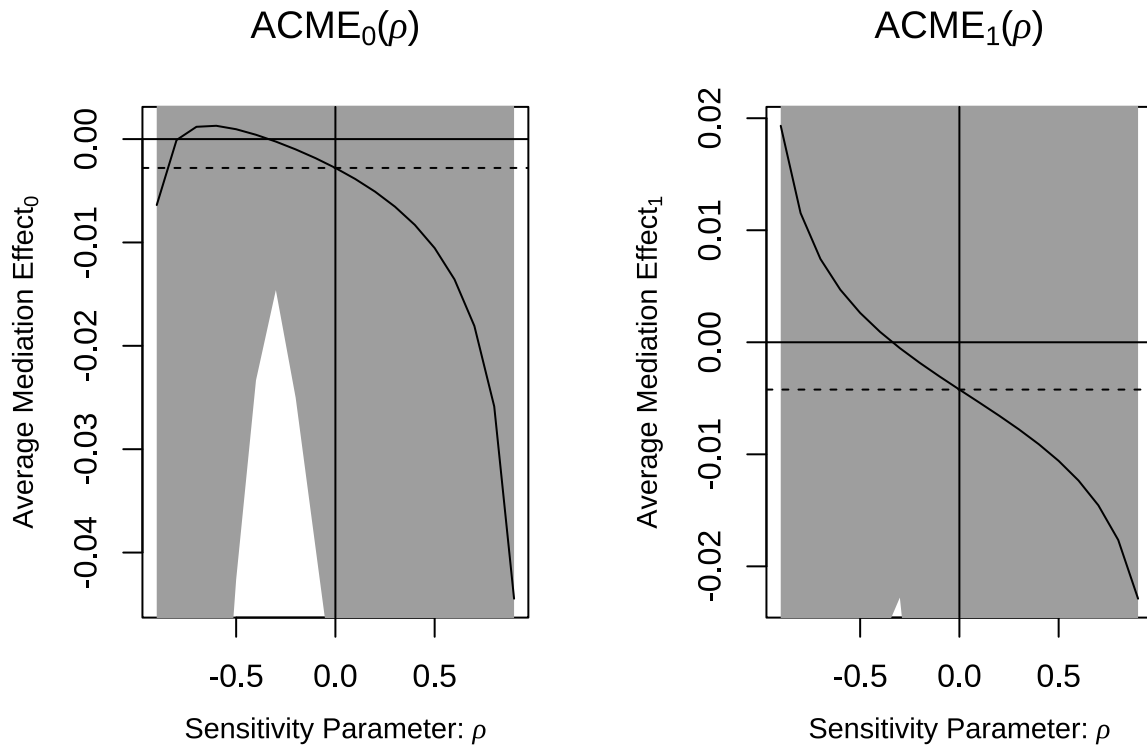

Supplement: s1 [file s1]
